# Supplementary material for: Genetic regulation of gene expression in the lung identifiesCST3andCD22as potential causal genes for airflow obstruction
Source: HighWire-hosted journal article supplement (doi:10.1136/thoraxjnl-2014-205630), 2014-09-02
Supplement: thoraxjnl-2014-205630supp_table1.xls [file thoraxjnl-2014-205630supp_table1.xls]

## Sheet: FEV1
Laval.Call	Laval.Confidence	Laval.eQTL.beta	Laval.eQTL.Zscore	Laval.effective.allele.and.reference.allele	A2F	Laval.GWAS.beta	Laval.GWAS.pvalue	Laval.Pearson.rho	Laval.Pearson.negative.log10.pvalue	Laval.Spearman.rho	Laval.Spearman.negative.log10.pvalue	Groningen.Call	Groningen.Confidence	Groningen.eQTL.beta	Groningen.eQTL.Zscore	Groningen.effective.allele.and.reference.allele	A2F	Groningen.GWAS.beta	Groningen.GWAS.pvalue	Groningen.Pearson.rho	Groningen.Pearson.negative.log10.pvalue	Groningen.Spearman.rho	Groningen.Spearman.negative.log10.pvalue	UBC.Call	UBC.Confidence	UBC.eQTL.beta	UBC.eQTL.Zscore	UBC.effective.allele.and.reference.allele	A2F	UBC.GWAS.beta	UBC.GWAS.pvalue	UBC.Pearson.rho	UBC.Pearson.negative.log10.pvalue	UBC.Spearman.rho	UBC.Spearman.negative.log10.pvalue	meta.Call	meta.Confidence	meta.eQTL.Zscore	meta.GWAS.Z	meta.GWAS.pvalue	rsID	Input	Transcript	Transcript Type	Species	Transcript/Description	Gene/SwissProt/Id	Gene/Proteome/Id	Gene/Unigene
NA	NA	0.424944	4.839	1 2	0.771216	3.04526	0.051533	0.012	0.09	-0.005	0.033	NA	NA	NA	NA	1 2	0.771295	3.38238	0.238432	0.155	0.843	0.158	0.863	NA	NA	NA	NA	1 2	0.755533	6.64377	0.00112341	0.096	0.914	0.085	0.775	1	0.86	6.796	3.53185	0.000412668	rs11761408	100132685_TGI_at	NM_001033519	REFSEQ	human	Homo sapiens WD repeat domain, phosphoinositide interacting 2	Q9Y4P8	WIPI2	Hs.122363
NA	NA	NA	NA	3 1	0.687948	2.58001	0.04276	-0.018	0.137	-0.03	0.258	NA	NA	NA	NA	3 1	0.726947	5.77056	0.0410355	-0.037	0.139	0.001	0.002	NA	NA	NA	NA	3 1	0.739712	5.3168	0.00494031	-0.048	0.36	-0.048	0.36	1	0.86	-6.071	3.33701	0.000846834	rs13008221	100149586_TGI_at	BU687885	DBEST	human
1	0.92	NA	NA	2 4	0.669031	3.96761	0.00253094	0.065	0.692	0.065	0.698	NA	NA	NA	NA	2 4	0.6809	-3.02731	0.25863	0.056	0.22	0.072	0.299	1	0.84	NA	NA	2 4	0.693152	4.2816	0.0206206	0.065	0.533	0.035	0.246	1	0.96	5.592	3.42092	0.000624094	rs2846204	100134088_TGI_at	NM_001031847	REFSEQ	human	Homo sapiens carnitine palmitoyltransferase 1A (liver) (CPT1A),	P50416	CPT1A	Hs.503043
NA	NA	NA	NA	1 2	0.581612	0.956028	0.434424	-0.082	0.97	-0.094	1.191	1	0.85	0.307696	4.522	1 2	0.609223	7.81675	0.000502802	-0.083	0.362	-0.091	0.408	NA	NA	0.368155	4.934	1 2	0.615495	-0.970132	0.565428	-0.055	0.426	-0.045	0.327	NA	NA	7.63	1.32377	0.185581	rs7557190	100132783_TGI_at	NM_014171	REFSEQ	human	Homo sapiens cysteine-rich PDZ-binding protein (CRIPT), mRNA.	Q96PQ7	CRIPT	Hs.133998
1	0.95	-0.507369	-7.945	1 3	0.527187	4.37366	0.000302076	0.085	1.02	0.084	1.004	NA	NA	-0.606742	-9.29	1 3	0.498786	4.19061	0.0837759	0.122	0.597	0.121	0.592	NA	NA	-0.558526	-8.348	1 3	0.503748	-0.199736	0.902889	0.098	0.951	0.081	0.718	1	0.96	-14.749	3.42114	0.000623587	rs9523661	100133459_TGI_at	AF339829	GENBANK	human	Homo sapiens clone IMAGE:609847, mRNA sequence.
1	0.93	-0.777111	-5.332	1 3	0.94087	8.76573	0.000701678	0.089	1.095	0.058	0.6	NA	NA	NA	NA	NA	NA	NA	NA	0.08	0.344	0.055	0.216	NA	NA	-0.695278	-4.768	1 3	0.941085	-3.85052	0.3153	-0.025	0.159	0.007	0.044	NA	NA	-8.159	2.67885	0.00738755	rs17415601	100129349_TGI_at	NM_002116	REFSEQ	human	Homo sapiens major histocompatibility complex, class I, A (HLA-A),	P10314	HLA-A	Hs.181244; Hs.713441
NA	NA	NA	NA	4 2	0.542552	-0.33932	0.78456	-0.044	0.417	-0.061	0.642	1	0.95	0.338144	4.612	4 2	0.523058	8.35033	0.000624407	-0.08	0.342	-0.046	0.176	NA	NA	NA	NA	4 2	0.528767	2.10616	0.216168	0.079	0.695	0.122	1.312	NA	NA	NA	1.11941	0.262963	rs2862954	100146161_TGI_at	NM_017902	REFSEQ	human	Homo sapiens hypoxia-inducible factor 1, alpha subunit inhibitor	Q9NWT6	HIF1AN	Hs.500788
NA	NA	NA	NA	3 1	0.733641	-4.3761	0.00209556	-0.049	0.477	-0.057	0.574	NA	NA	NA	NA	3 1	0.760055	0.493486	0.872744	0.019	0.065	0.005	0.017	NA	NA	NA	NA	3 1	0.731585	-2.86048	0.132073	0.041	0.291	0.013	0.08	1	0.86	-5.942	-3.33464	0.00085409	rs1054252	100151639_TGI_at	BC025299	GENBANK	human	Sim:BC080519, Homo sapiens immunoglobulin mu binding protein 2, mRNA (cDNA clone IMAGE:3509475). (e=0.0,score=5259,100% ID over 2653nt [query=2653nt], plus strand, blastn,Homo sapiens)	P38935	IGHMBP2	Hs.503048
NA	NA	NA	NA	3 1	0.626628	4.25144	0.000920302	-0.12	1.753	-0.101	1.33	NA	NA	NA	NA	3 1	0.612663	5.11735	0.0438973	-0.252	1.779	-0.218	1.404	NA	NA	NA	NA	3 1	0.60669	0.767842	0.677785	-0.113	1.174	-0.105	1.047	1	0.9	-4.922	3.54237	0.000396543	rs4035021	100135446_TGI_at	Y14040	GENBANK	human	Homo sapiens mRNA for CASH beta protein.	O15519	CFLAR	Hs.390736
NA	NA	NA	NA	3 2	0.204513	-0.872348	0.565984	-0.04	0.361	-0.027	0.226	1	0.92	0.373298	4.293	3 2	0.195076	-10.7523	0.000489931	-0.003	0.009	0.042	0.157	NA	NA	NA	NA	3 2	0.201537	-0.730973	0.728969	0.098	0.943	0.064	0.523	NA	NA	6.33	-1.41428	0.15728	rs6808570	100151853_TGI_at	BC015846	GENBANK	human	Homo sapiens, clone IMAGE:4618125, mRNA.
NA	NA	-0.809202	-8.73	3 1	0.86685	-4.7461	0.00669063	0.058	0.589	0.066	0.712	NA	NA	-0.634599	-5.854	3 1	0.895635	-3.2001	0.402432	0.052	0.202	0.05	0.195	NA	NA	-0.622717	-5.382	3 1	0.888527	-8.40561	0.00482512	0.117	1.236	0.074	0.636	1	0.84	-11.801	-3.58232	0.000340561	rs4143153	100127953_TGI_at	ENST00000382045	ENSEMBL	human	Sim:AK124409, Homo sapiens cDNA FLJ42418 fis, clone BLADE2001987. (e=0.0,score=3673,99% ID over 1866nt [query=1875nt], plus strand, blastn,Homo sapiens)			Hs.446195
1	0.84	0.426877	5.492	3 1	0.776596	4.78147	0.000729729	0.099	1.298	0.09	1.113	NA	NA	0.350257	4.487	3 1	0.700243	4.62983	0.0687513	0.001	0.004	0.033	0.12	NA	NA	0.472526	5.734	3 1	0.738356	-0.888955	0.650746	-0.058	0.453	-0.035	0.245	NA	NA	9.03	3.18154	0.00146496	rs1419696	100143227_TGI_at	X81001	GENBANK	human	H.sapiens HCG II mRNA.			Hs.661100
NA	NA	1.00324	8.428	3 4	0.906507	6.56348	0.00361101	0.016	0.124	0.011	0.085	NA	NA	0.640289	5.251	3 4	0.911394	1.12793	0.785382	-0.269	1.99	-0.235	1.588	NA	NA	0.7707	5.841	3 4	0.912418	5.64909	0.0439177	-0.074	0.628	-0.046	0.339	1	0.85	11.343	3.50007	0.000465144	rs769178	100125842_TGI_at	NM_147130	REFSEQ	human	Homo sapiens natural cytotoxicity triggering receptor 3 (NCR3),	O14931	NCR3	Hs.509513
NA	NA	NA	NA	4 2	0.224596	0.673483	0.62901	-0.085	1.022	-0.079	0.913	NA	NA	-0.369296	-4.307	4 2	0.211165	2.28109	0.43339	-0.192	1.152	-0.232	1.558	1	0.89	-0.426279	-4.793	4 2	0.212329	7.22751	0.000750482	0.024	0.159	-0.015	0.089	NA	NA	-7.308	1.90585	0.0566691	rs9911523	100153225_TGI_at	AA702582	DBEST	human
NA	NA	NA	NA	2 4	0.711418	3.77224	0.00431683	-0.045	0.424	-0.034	0.295	NA	NA	NA	NA	2 4	0.672015	3.93045	0.128737	-0.041	0.152	0.041	0.154	NA	NA	NA	NA	2 4	0.67834	2.0853	0.267784	0.005	0.028	0.01	0.062	1	0.92	4.598	3.31636	0.000911977	rs4945162	100126366_TGI_at	NM_024684	REFSEQ	human	Homo sapiens chromosome 11 open reading frame 67 (C11orf67), mRNA.	Q9H7C9	C11orf67	Hs.503357
NA	NA	-0.472665	-5.071	3 1	0.870066	-4.58561	0.00507092	-0.104	1.398	-0.076	0.876	NA	NA	NA	NA	3 1	0.782703	-3.06929	0.27107	-0.098	0.444	-0.074	0.31	NA	NA	NA	NA	3 1	0.831204	-3.08311	0.17082	0.024	0.156	0.011	0.066	1	0.81	-7.436	-3.30314	0.000956097	rs2976084	100147511_TGI_at	BC111371	GENBANK	human	Homo sapiens hypothetical LOC401074, mRNA (cDNA clone IMAGE:7473380).			Hs.528540
NA	NA	NA	NA	3 1	0.278518	1.53086	0.249383	0.005	0.033	0.012	0.094	NA	NA	NA	NA	3 1	0.275443	0.820695	0.768936	0.059	0.234	0.062	0.252	1	0.93	-0.471847	-6.172	3 1	0.282159	-6.62337	0.00057863	-0.063	0.505	-0.01	0.062	NA	NA	-7.829	-0.407134	0.68391	rs3761916	100127066_TGI_at	ENST00000361877	ENSEMBL	human	Sim:AK094426, Homo sapiens cDNA FLJ37107 fis, clone BRACE2020157. (e=0.0,score=5824,99% ID over 2947nt [query=2950nt], plus strand, blastn,Homo sapiens)	Q9HDB9
1	0.84	0.807234	12.816	3 1	0.739687	3.94639	0.00247874	0.159	2.774	0.17	3.117	NA	NA	0.473013	6.352	3 1	0.706581	4.98744	0.08055	0.118	0.572	0.089	0.394	NA	NA	0.669712	8.403	3 1	0.742479	1.55115	0.43518	0.227	3.671	0.166	2.14	1	0.98	16.394	3.36354	0.000769501	rs11608104	100151780_TGI_at	AF132811	GENBANK	human		Q9BY67	IGSF4	Hs.370510
NA	NA	NA	NA	1 3	0.763595	4.71933	0.00105044	-0.084	1.004	-0.087	1.058	NA	NA	NA	NA	1 3	0.821602	0.784554	0.786269	-0.069	0.287	-0.117	0.567	NA	NA	NA	NA	1 3	0.771801	4.82984	0.0184628	-0.107	1.081	-0.125	1.364	1	0.84	-4.114	3.94631	7.93654e-05	rs1543438	100158784_TGI_at	BI334576	DBEST	human		Q07817	BCL2L1	Hs.516966
NA	NA	NA	NA	3 1	0.84634	-5.15086	0.0027373	0.057	0.581	0.044	0.413	NA	NA	NA	NA	3 1	0.871363	-5.48927	0.083087	0.211	1.334	0.19	1.138	NA	NA	NA	NA	3 1	0.85889	-4.39335	0.10393	0.059	0.469	0.06	0.48	1	0.89	-5.202	-3.7234	0.000196561	rs2289470	100158135_TGI_at	NM_030923	REFSEQ	human	Homo sapiens transmembrane protein 163 (TMEM163), mRNA.	Q8TC26	TMEM163	Hs.369471
NA	NA	NA	NA	1 3	0.944446	1.37001	0.615611	0.019	0.146	0.045	0.419	NA	NA	NA	NA	1 3	0.902914	-1.47505	0.728267	0.042	0.158	0.037	0.135	1	0.99	0.581533	4.443	1 3	0.912352	11.4426	0.000459748	0.096	0.913	0.105	1.043	NA	NA	6.607	2.20964	0.0271302	rs1565313	100142579_TGI_at	NM_152837	REFSEQ	human	Homo sapiens sorting nexin 16 (SNX16), transcript variant 3, mRNA.	P57768	SNX16	Hs.492121
NA	NA	-0.579129	-8.393	3 1	0.712752	-0.695449	0.596465	-0.047	0.443	-0.039	0.35	NA	NA	-0.409762	-4.84	3 1	0.773057	-3.24872	0.324806	0.052	0.204	0.048	0.185	1	0.96	-0.48827	-5.682	3 1	0.721908	-7.66434	0.000145849	0.146	1.743	0.126	1.378	NA	NA	-11.207	-2.12655	0.0334572	rs3803761	100135396_TGI_at	NM_144997	REFSEQ	human	Homo sapiens folliculin (FLCN), transcript variant 1, mRNA.	Q8NFG4	Flcn	Hs.513975
NA	NA	NA	NA	4 2	0.907803	6.40178	0.00161548	0.046	0.436	0.06	0.624	NA	NA	NA	NA	4 2	0.921117	7.79449	0.0878184	-0.088	0.389	-0.1	0.457	NA	NA	NA	NA	4 2	0.942466	0.655686	0.856687	0.001	0.004	0.023	0.15	1	0.89	-5.503	3.32895	0.000871728	rs11739840	100155226_TGI_at	AK075204	GENBANK	human	Homo sapiens cDNA FLJ90723 fis, clone PLACE1009196.			Hs.649468
NA	NA	0.506922	6.484	1 3	0.776593	-0.493436	0.735574	-0.008	0.056	0.001	0.006	1	0.94	0.56838	6.672	1 3	0.763761	10.2342	0.000873497	0.058	0.233	0.061	0.248	NA	NA	0.696413	8.23	1 3	0.778089	-2.81287	0.180709	0.026	0.171	0.021	0.132	NA	NA	12.251	-0.184457	0.853655	rs6691701	100140105_TGI_at	NM_020239	REFSEQ	human	Homo sapiens CDC42 small effector 1 (CDC42SE1), transcript variant		CDC42SE1	Hs.22065
NA	NA	NA	NA	3 1	0.626628	4.25144	0.000920302	-0.048	0.455	-0.032	0.278	NA	NA	NA	NA	3 1	0.612663	5.11735	0.0438973	-0.046	0.176	-0.035	0.127	NA	NA	NA	NA	3 1	0.60669	0.767842	0.677785	-0.019	0.119	0.029	0.19	1	0.91	-5.24	3.54237	0.000396543	rs4035021	100130971_TGI_at	NM_139163	REFSEQ	human	Homo sapiens amyotrophic lateral sclerosis 2 (juvenile) chromosome		ALS2CR12	Hs.107944
1	0.97	0.782881	5.302	1 3	0.94087	8.76573	0.000701678	-0.079	0.922	-0.081	0.962	NA	NA	NA	NA	NA	NA	NA	NA	-0.008	0.028	-0.071	0.294	NA	NA	NA	NA	1 3	0.941085	-3.85052	0.3153	0.026	0.171	0.031	0.207	NA	NA	6.702	2.67885	0.00738755	rs17415601	100125007_TGI_at	AF036974	DBEST	human	Sim:BC011879, Homo sapiens cDNA clone IMAGE:3605646. (e=3e-70,score=268,91% ID over 196nt [query=276nt], plus strand, blastn,Homo sapiens)	Q2KJ03		Hs.653168
NA	NA	-1.02539	-8.75	3 4	0.906507	6.56348	0.00361101	-0.006	0.041	-0.002	0.012	NA	NA	-0.925771	-8.237	3 4	0.911394	1.12793	0.785382	-0.134	0.684	-0.071	0.297	NA	NA	-0.901983	-6.915	3 4	0.912418	5.64909	0.0439177	-0.06	0.48	-0.068	0.565	1	0.85	-13.834	3.50007	0.000465144	rs769178	100142732_TGI_at	NM_138282	REFSEQ	human	Homo sapiens ATPase, H+ transporting, lysosomal 13kDa, V1 subunit	O95670	ATP6V1G2	Hs.249227
NA	NA	NA	NA	3 1	0.654741	-1.17528	0.356503	-0.031	0.264	-0.047	0.447	NA	NA	NA	NA	3 1	0.675564	-1.57114	0.556422	0.044	0.169	0.024	0.084	1	0.94	0.383821	4.744	3 1	0.64251	6.74725	0.000447449	-0.205	3.068	-0.131	1.463	NA	NA	NA	0.470693	0.63786	rs3783281	100138373_TGI_at	NM_024558	REFSEQ	human	Homo sapiens chromosome 14 open reading frame 138 (C14orf138),	Q9H867	C14orf138	Hs.558541
1	0.86	NA	NA	2 4	0.669031	3.96761	0.00253094	-0.043	0.405	-0.043	0.402	NA	NA	-0.329691	-4.325	2 4	0.6809	-3.02731	0.25863	-0.057	0.226	0.039	0.147	NA	NA	-0.448165	-5.746	2 4	0.693152	4.2816	0.0206206	-0.07	0.584	-0.056	0.439	1	0.96	-8.013	3.42092	0.000624094	rs2846204	100127680_TGI_at	NM_181514	REFSEQ	human	Homo sapiens mitochondrial ribosomal protein L21 (MRPL21), nuclear	Q7Z2W9	MRPL21	Hs.503047; Hs.503048
1	0.87	-0.297885	-4.541	4 2	0.369252	-4.28275	0.000292686	0.045	0.423	0.03	0.259	NA	NA	NA	NA	4 2	0.381075	2.0231	0.429978	0.175	1.006	0.206	1.284	NA	NA	NA	NA	4 2	0.405725	-0.467446	0.796074	-0.062	0.5	-0.052	0.391	NA	NA	-5.525	-3.22574	0.00125648	rs259386	100135874_TGI_at	BC035182	GENBANK	human	Homo sapiens cDNA clone IMAGE:5266307.			Hs.557608
NA	NA	-0.712483	-9.57	4 1	0.795508	-3.85516	0.00883694	0.122	1.779	0.122	1.8	NA	NA	-0.525955	-4.946	4 1	0.868932	-5.8114	0.117466	-0.017	0.059	-0.009	0.031	NA	NA	-1.04799	-11.997	4 1	0.858897	-5.22776	0.0367532	-0.02	0.128	-0.026	0.168	1	0.94	-15.575	-3.35362	0.000797627	rs7607174	100138467_TGI_at	BT006710	GENBANK	human	Homo sapiens aspartyl-tRNA synthetase mRNA, complete cds.	P14868	DARS	Hs.503787
NA	NA	-1.22436	-24.487	1 3	0.712275	-0.671817	0.623442	-0.063	0.672	-0.044	0.415	NA	NA	-1.09107	-20.326	1 3	0.69176	-0.890308	0.736796	0.066	0.272	0.055	0.219	1	0.87	-1.09234	-18.181	1 3	0.684703	-6.43032	0.000682109	0.218	3.414	0.213	3.285	NA	NA	-36.619	-2.05895	0.0394994	rs7336329	100129481_TGI_at	ENST00000378172	ENSEMBL	human	Sim:AF038499, AF218382 Homo sapiens soluble guanylyl cyclase subunit beta 2 (GUCY1B2) mRNA, complete cds. (e=0.0,score=5444,99% ID over 2748nt [query=2749nt], plus strand, blastn,Homo sapiens)	O75343	GUCY1B2	Hs.411573
NA	NA	-0.515164	-7.57	3 1	0.649688	-1.30278	0.308996	0.015	0.113	0.005	0.037	NA	NA	NA	NA	3 1	0.631023	4.99286	0.0411727	-0.063	0.256	-0.102	0.474	1	0.86	-0.432253	-5.644	3 1	0.652562	-6.1486	0.000902707	0.165	2.129	0.111	1.144	NA	NA	-10.14	-1.80653	0.0708356	rs11673981	100146525_TGI_at	XM_945005	REFSEQ	human	PREDICTED: Homo sapiens hypothetical LOC285047 (LOC285047), mRNA.
1	0.85	NA	NA	3 4	0.878499	6.32367	0.000442162	0.054	0.541	0.054	0.538	NA	NA	NA	NA	3 4	0.896837	3.11772	0.468539	0.259	1.863	0.27	1.994	NA	NA	0.664539	6.152	3 4	0.874074	6.10611	0.01761	0.083	0.739	0.104	1.031	1	0.9	8.184	4.26017	2.0427e-05	rs11108335	100137266_TGI_at	NM_021229	REFSEQ	human	Homo sapiens netrin 4 (NTN4), mRNA.	Q9HB63	Ntn4	Hs.201034
NA	NA	0.418865	6.155	4 2	0.60297	0.817407	0.515549	-0.022	0.177	-0.014	0.107	NA	NA	NA	NA	4 2	0.56191	-1.57776	0.511235	0.149	0.794	0.138	0.708	1	0.96	0.458032	6.096	4 2	0.526078	6.25905	0.000493663	0.162	2.065	0.152	1.859	NA	NA	8.968	1.9268	0.0540042	rs6668514	100136241_TGI_at	AI921300	DBEST	human	Sim:XM_001715299, PREDICTED: Homo sapiens calpain 8 (CAPN8), mRNA. (e=1e-168,score=593,98% ID over 313nt [query=613nt], plus strand, blastn,Homo sapiens)			Hs.291487; Hs.670199
NA	NA	-0.609725	-8.413	2 4	0.744713	0.0707057	0.959367	-0.037	0.333	-0.04	0.364	1	0.89	-0.485685	-6.364	2 4	0.708738	-9.26101	0.000761195	0.005	0.017	0.006	0.02	NA	NA	-0.509859	-6.564	2 4	0.684938	1.92536	0.307727	0.026	0.174	-0.006	0.035	NA	NA	-12.389	-0.243234	0.807824	rs1871417	100126885_TGI_at	NM_206914	REFSEQ	human	Homo sapiens family with sequence similarity 119, member B	Q96AZ1	FAM119B	Hs.632720
NA	NA	NA	NA	3 1	0.94371	9.69529	0.00217317	-0.097	1.253	-0.097	1.249	NA	NA	NA	NA	3 1	0.935985	5.84124	0.201058	0.011	0.039	-0.017	0.057	NA	NA	NA	NA	NA	NA	NA	NA	-0.068	0.561	-0.073	0.619	1	0.81	4.223	3.31733	0.000908831	rs7766094	100151371_TGI_at	NM_020442	REFSEQ	human	Homo sapiens valyl-tRNA synthetase 2, mitochondrial (putative)		VARSL	Hs.597526
NA	NA	-0.589322	-4.335	1 3	0.0644208	-8.20179	0.000559013	-0.084	0.998	-0.071	0.793	NA	NA	NA	NA	1 3	0.0590097	-3.16043	0.546109	0.2	1.232	0.235	1.589	NA	NA	NA	NA	1 3	0.0665507	-1.31631	0.711615	0.112	1.161	0.12	1.275	1	0.92	-4.531	-3.36254	0.000772296	rs12603519	100162386_TGI_at	NM_153338	REFSEQ	human	Homo sapiens gamma-glutamyltransferase 6 homolog (rat) (GGT6),	Q6P531	GGT6	Hs.130749
1	0.97	-0.543117	-4.607	3 4	0.88207	-7.21462	0.000582678	0.039	0.348	0.061	0.638	NA	NA	NA	NA	3 4	0.891631	-4.44412	0.290685	-0.173	0.987	-0.154	0.835	NA	NA	NA	NA	3 4	0.883075	-1.19093	0.687749	0.022	0.139	-0.044	0.318	1	0.97	-5.299	-3.41271	0.000643199	rs1735725	100140637_TGI_at	BU580655	DBEST	human		O15394	NCAM2	Hs.473450
NA	NA	-0.37639	-5.849	2 4	0.584007	1.90328	0.110891	0.063	0.669	0.039	0.355	1	0.82	-0.398946	-5.726	2 4	0.557499	-8.30802	0.000429065	-0.164	0.916	-0.091	0.404	NA	NA	-0.45023	-6.513	2 4	0.548874	0.868774	0.600847	0.002	0.011	0.016	0.1	NA	NA	-10.403	0.803993	0.421401	rs743562	100132153_TGI_at	NM_133482	REFSEQ	human	Homo sapiens RAD50 homolog (S. cerevisiae) (RAD50), transcript	Q92878	RAD50	Hs.655835
NA	NA	0.286994	4.211	1 3	0.456115	-3.66377	0.00235252	-0.123	1.823	-0.105	1.403	NA	NA	NA	NA	1 3	0.469425	-5.08179	0.0417483	-0.029	0.105	-0.029	0.106	NA	NA	NA	NA	1 3	0.484888	-3.8312	0.0290158	-0.145	1.719	-0.085	0.767	1	0.88	5.8	-4.02316	5.74227e-05	rs10013696	100152186_TGI_at	AF070525	GENBANK	human	Homo sapiens clone 24706 mRNA sequence.	Q9HAV7	GRPEL1	Hs.443723
1	0.82	0.626489	4.453	3 4	0.937363	8.13148	0.00077341	-0.05	0.489	-0.065	0.694	NA	NA	NA	NA	3 4	0.909101	-3.96775	0.33187	0.081	0.347	0.065	0.267	NA	NA	NA	NA	3 4	0.931559	-2.24435	0.484617	-0.062	0.504	-0.056	0.439	NA	NA	4.922	2.20011	0.0277988	rs3026762	100151052_TGI_at	AK127432	GENBANK	human	Homo sapiens cDNA FLJ45524 fis, clone BRTHA2026290.	Q8N9B8	Rasgef1a	Hs.125293
NA	NA	-0.380597	-5.3	3 1	0.712752	-0.695449	0.596465	0.037	0.329	0.036	0.321	NA	NA	NA	NA	3 1	0.773057	-3.24872	0.324806	-0.117	0.563	-0.102	0.469	1	0.98	-0.404028	-4.674	3 1	0.721908	-7.66434	0.000145849	0.03	0.199	-0.009	0.054	NA	NA	-7.354	-2.12655	0.0334572	rs3803761	100143159_TGI_at	AK091337	GENBANK	human	Homo sapiens cDNA FLJ34018 fis, clone FCBBF2002801.
NA	NA	0.668522	9.856	2 3	0.375887	-4.65061	0.000360428	-0.07	0.779	-0.087	1.057	NA	NA	0.451918	6.305	2 3	0.351167	-3.06737	0.22835	0.094	0.423	0.125	0.617	NA	NA	0.436353	5.656	2 3	0.389041	0.767664	0.70207	-0.124	1.352	-0.079	0.693	1	0.94	12.831	-3.34143	0.000833466	rs6542518	100154256_TGI_at	ENST00000334816	ENSEMBL	human		Q3KRA6	LOC130355	Hs.99488
NA	NA	NA	NA	3 1	0.556261	4.67732	7.53023e-05	0.079	0.911	0.094	1.191	NA	NA	NA	NA	3 1	0.54492	0.878992	0.725948	-0.144	0.754	-0.109	0.514	NA	NA	NA	NA	3 1	0.551405	1.21573	0.504172	-0.058	0.453	-0.054	0.411	1	0.91	4.175	3.9056	9.39927e-05	rs12809229	100153761_TGI_at	AK057885	GENBANK	human	Homo sapiens cDNA FLJ25156 fis, clone CBR07981.
1	0.92	-0.393508	-5.548	3 1	0.626628	4.25144	0.000920302	-0.061	0.644	-0.041	0.373	NA	NA	-0.368957	-5.164	3 1	0.612663	5.11735	0.0438973	0.113	0.538	0.149	0.792	NA	NA	-0.450419	-5.713	3 1	0.60669	0.767842	0.677785	-0.067	0.551	-0.039	0.272	1	0.9	-9.417	3.54237	0.000396543	rs4035021	100160429_TGI_at	NM_131916	REFSEQ	human	Homo sapiens peptidylprolyl isomerase (cyclophilin)-like 3 (PPIL3),	Q9H2H8	PPIL3	Hs.121076
NA	NA	-0.361182	-4.808	3 1	0.695297	-0.180098	0.893657	-0.066	0.718	-0.048	0.466	1	0.86	-0.376328	-4.674	3 1	0.718324	-11.414	2.17795e-05	-0.147	0.775	-0.145	0.765	NA	NA	NA	NA	3 1	0.708811	1.34179	0.500139	0.063	0.513	0.026	0.174	NA	NA	-6.886	-0.840855	0.400429	rs12980672	100133986_TGI_at	BG940075	DBEST	human	Sim:AA604922, Transcribed locus (e=1e-111,score=400,100% ID over 202nt [query=230nt], plus strand, blastn)
NA	NA	NA	NA	3 1	0.259551	-3.41598	0.0171379	0.036	0.318	0.052	0.511	NA	NA	NA	NA	3 1	0.306915	0.160339	0.951589	0.083	0.362	0.044	0.168	NA	NA	NA	NA	3 1	0.303263	-5.62304	0.00218089	0.06	0.479	0.055	0.426	1	0.95	-4.302	-3.51621	0.000437748	rs4550905	100131093_TGI_at	AA708738	DBEST	human	Sim:DB323034, Transcribed locus, strongly similar to XP_001175218.1 PREDICTED: hypothetical protein [Pan troglodytes] (e=1e-163,score=575,98% ID over 309nt [query=442nt], plus strand, blastn)
NA	NA	NA	NA	3 2	0.938556	5.03774	0.0460143	0.033	0.284	-0.004	0.025	NA	NA	NA	NA	3 2	0.880924	7.08593	0.1	-0.127	0.635	-0.069	0.289	NA	NA	NA	NA	3 2	0.930174	9.72262	0.00699422	-0.039	0.272	0.003	0.015	1	0.93	4.261	3.33852	0.000842255	rs12750810	100136709_TGI_at	NM_024579	REFSEQ	human	Homo sapiens chromosome 1 open reading frame 54 (C1orf54), mRNA.	Q8WWF1	FLJ23221	Hs.91283
NA	NA	0.652601	4.287	4 3	0.928275	5.06084	0.0605223	0.023	0.184	0.034	0.296	NA	NA	NA	NA	4 3	0.930462	5.64591	0.262262	-0.003	0.011	0.006	0.019	NA	NA	NA	NA	4 3	0.938858	12.7519	0.00107111	0.036	0.249	0.049	0.371	1	0.9	5.4	3.30153	0.000961579	rs11942936	100130355_TGI_at	AI417595	DBEST	human	Transcribed locus
NA	NA	0.49377	6.271	3 1	0.754953	-1.04565	0.456728	0.011	0.081	0.035	0.31	1	0.88	0.367976	4.555	3 1	0.745146	-9.63657	0.000446162	-0.046	0.178	-0.08	0.342	NA	NA	0.590355	7.903	3 1	0.716233	0.107556	0.955711	-0.053	0.402	-0.059	0.462	NA	NA	10.942	-1.43738	0.150611	rs2286175	100142476_TGI_at	NM_005302	REFSEQ	human	Homo sapiens G protein-coupled receptor 37 (endothelin receptor	O15354	GPR37	Hs.406094
NA	NA	NA	NA	3 1	0.943258	-10.1654	0.000115084	0.163	2.885	0.153	2.605	NA	NA	NA	NA	NA	NA	NA	NA	-0.029	0.104	-0.048	0.187	NA	NA	NA	NA	3 1	0.935632	-0.69935	0.858285	0.031	0.206	0.038	0.266	1	0.9	-4.383	-3.59599	0.000323155	rs12232164	100129113_TGI_at	BQ575897	DBEST	human	Transcribed locus
NA	NA	NA	NA	3 2	0.938556	5.03774	0.0460143	0.032	0.276	0.031	0.261	NA	NA	NA	NA	3 2	0.880924	7.08593	0.1	0.142	0.74	0.127	0.635	NA	NA	0.771213	5.329	3 2	0.930174	9.72262	0.00699422	0.219	3.46	0.186	2.613	1	0.93	6.093	3.33852	0.000842255	rs12750810	100138305_TGI_at	NM_178426	REFSEQ	human	Homo sapiens aryl hydrocarbon receptor nuclear translocator (ARNT),	P27540	ARNT	Hs.632446
1	0.95	-0.741541	-5.062	1 3	0.94087	8.76573	0.000701678	0.005	0.035	-0.004	0.026	NA	NA	NA	NA	NA	NA	NA	NA	-0.066	0.268	-0.083	0.363	NA	NA	NA	NA	1 3	0.941085	-3.85052	0.3153	-0.047	0.345	-0.081	0.724	NA	NA	-7.102	2.67885	0.00738755	rs17415601	100160221_TGI_at	NM_002127	REFSEQ	human	Homo sapiens major histocompatibility complex, class I, G (HLA-G),	P17693	HLA-G	Hs.181244; Hs.512152
1	0.83	-0.29528	-4.24	2 4	0.618128	-4.12027	0.000870407	0.093	1.165	0.104	1.386	NA	NA	NA	NA	2 4	0.682129	3.6225	0.181719	-0.006	0.019	0.021	0.075	NA	NA	NA	NA	2 4	0.69046	3.51005	0.075335	0.115	1.202	0.088	0.812	NA	NA	NA	-2.15751	0.0309657	rs2250997	100159245_TGI_at	BC101414	GENBANK	human				Hs.438549
NA	NA	NA	NA	3 1	0.467554	-3.97699	0.00089861	-0.007	0.053	-0.023	0.187	NA	NA	NA	NA	3 1	0.470144	0.822509	0.738888	-0.001	0.003	-0.047	0.18	NA	NA	NA	NA	3 1	0.481305	-2.34203	0.161023	-0.056	0.437	-0.071	0.604	1	0.92	-4.091	-3.45232	0.000555789	rs2905346	100145345_TGI_at	ENST00000222607	ENSEMBL	human	Sim:XM_001128503, PREDICTED: Homo sapiens similar to Six transmembrane epithelial antigen of prostate (MGC87042), mRNA. (e=0.0,score=1596,100% ID over 805nt [query=832nt], plus strand, blastn,Homo sapiens)		MGC87042	Hs.512234
1	0.92	0.574623	5.735	3 4	0.878499	6.32367	0.000442162	0.028	0.232	0.06	0.627	NA	NA	0.623886	5.428	3 4	0.896837	3.11772	0.468539	-0.088	0.39	-0.088	0.391	NA	NA	0.662313	6.181	3 4	0.874074	6.10611	0.01761	-0.046	0.343	0.025	0.161	1	0.9	9.974	4.26017	2.0427e-05	rs11108335	100145491_TGI_at	NM_003095	REFSEQ	human	Homo sapiens small nuclear ribonucleoprotein polypeptide F (SNRPF),	P62306	SNRPF	Hs.105465
NA	NA	0.367499	5.048	3 1	0.715358	3.74664	0.00466206	-0.077	0.882	-0.07	0.773	NA	NA	NA	NA	3 1	0.707657	0.590946	0.826326	-0.114	0.546	-0.097	0.443	NA	NA	0.533061	6.728	3 1	0.732574	3.78629	0.0512765	-0.054	0.411	-0.056	0.437	1	0.96	7.934	3.35633	0.000789833	rs1372998	100150242_TGI_at	AK093324	GENBANK	human	Homo sapiens cDNA FLJ36005 fis, clone TESTI2015350.
NA	NA	NA	NA	3 2	0.938556	5.03774	0.0460143	-0.084	1.004	-0.093	1.178	NA	NA	NA	NA	3 2	0.880924	7.08593	0.1	0.119	0.577	0.131	0.661	NA	NA	NA	NA	3 2	0.930174	9.72262	0.00699422	-0.022	0.14	0.023	0.146	1	0.91	-7.351	3.33852	0.000842255	rs12750810	100136516_TGI_at	hCT1834979.1	CELERA	human	Sim:XM_001725501, PREDICTED: Homo sapiens similar to hCG1795719 (LOC649203), mRNA. (e=0.0,score=1166,100% ID over 588nt [query=588nt], plus strand, blastn,Homo sapiens)
NA	NA	-0.917808	-5.159	3 1	0.94371	9.69529	0.00217317	-0.074	0.83	-0.088	1.076	NA	NA	NA	NA	3 1	0.935985	5.84124	0.201058	0.122	0.599	0.131	0.66	NA	NA	NA	NA	NA	NA	NA	NA	0.013	0.076	0.002	0.009	1	0.91	-6.337	3.31733	0.000908831	rs7766094	100121628_TGI_at	NM_014068	REFSEQ	human	Homo sapiens psoriasis susceptibility 1 candidate 1 (PSORS1C1),	Q9UIG5	PSORS1C1	Hs.310958
NA	NA	0.879553	16.738	4 2	0.607564	-0.0468269	0.968897	-0.105	1.402	-0.104	1.382	NA	NA	0.689235	10.311	4 2	0.623786	-1.24471	0.638835	-0.183	1.079	-0.146	0.772	1	0.96	0.774938	12.319	4 2	0.628766	6.53672	0.000206216	0.043	0.311	0.077	0.674	NA	NA	23.194	1.45591	0.145418	rs6032142	100159151_TGI_at	NM_033542	REFSEQ	human	Homo sapiens SYS1 Golgi-localized integral membrane protein homolog	Q8N2H4		Hs.655055
NA	NA	NA	NA	4 1	0.689694	3.91606	0.00281764	0.066	0.718	0.063	0.665	NA	NA	NA	NA	4 1	0.67295	4.5269	0.0696064	0.084	0.367	0.031	0.114	NA	NA	NA	NA	4 1	0.684984	1.4076	0.444801	0.053	0.409	0.048	0.361	1	0.9	4.827	3.35946	0.000780958	rs1545775	100156666_TGI_at	NM_001029853	REFSEQ	human	Homo sapiens phosphodiesterase 8B (PDE8B), transcript variant 4,	O95263	PDE8B	Hs.584830
NA	NA	-0.800935	-11.799	4 3	0.738825	-1.87907	0.163781	-0.026	0.212	-0.041	0.382	NA	NA	-0.596092	-7.131	4 3	0.777913	-0.621857	0.839511	-0.112	0.532	-0.087	0.381	1	0.97	-0.642956	-8.126	4 3	0.745205	6.8559	0.000342855	-0.216	3.374	-0.2	2.937	NA	NA	-15.991	0.344366	0.730571	rs9937985	100141137_TGI_at	BC101139	GENBANK	human		Q7Z6E9	RBBP6	Hs.188553
NA	NA	NA	NA	3 2	0.667636	-3.64689	0.00484934	-0.125	1.869	-0.144	2.336	NA	NA	NA	NA	3 2	0.706299	-4.31024	0.100074	0.116	0.56	0.118	0.575	NA	NA	NA	NA	3 2	0.717807	-4.83378	0.0170065	0.029	0.196	0.014	0.083	1	0.98	5.247	-3.78726	0.00015232	rs11150357	100162346_TGI_at	NM_001076780	REFSEQ	human	Homo sapiens polycystic kidney disease 1-like 2 (PKD1L2),	Q7Z442	PKD1L2	Hs.413525
NA	NA	-0.392096	-5.93	2 4	0.536604	1.63381	0.178526	0.031	0.264	0.013	0.096	NA	NA	-0.324359	-4.535	2 4	0.570153	-1.66066	0.484515	-0.014	0.049	0.008	0.028	1	0.93	-0.384782	-5.233	2 4	0.557367	-6.65298	0.000234152	0	0.002	-0.019	0.118	NA	NA	-9.091	-0.478375	0.632383	rs270729	100158097_TGI_at	NM_018150	REFSEQ	human	Homo sapiens chromosome 1 open reading frame 164 (C1orf164), mRNA.	Q5VTB9	FLJ10597	Hs.456557
NA	NA	NA	NA	4 3	0.630072	-2.5851	0.0326313	-0.016	0.121	0.014	0.108	NA	NA	-0.339992	-4.485	4 3	0.654154	-2.70013	0.301283	0.055	0.215	0.053	0.206	NA	NA	NA	NA	4 3	0.674074	-5.79832	0.00178457	0.105	1.053	0.043	0.308	1	0.98	-4.817	-3.33883	0.00084133	rs12003548	100126462_TGI_at	AK123875	GENBANK	human	Homo sapiens cDNA FLJ41881 fis, clone OCBBF2021833.
NA	NA	NA	NA	3 1	0.793805	-5.05246	0.00102214	-0.023	0.182	-0.056	0.566	NA	NA	NA	NA	3 1	0.808072	1.00163	0.749196	0.102	0.468	0.093	0.417	NA	NA	NA	NA	3 1	0.788564	-3.32231	0.145443	0.044	0.32	0.02	0.129	1	0.9	4.631	-3.44271	0.000575907	rs6515375	100125967_TGI_at	NM_000099	REFSEQ	human	Homo sapiens cystatin C (amyloid angiopathy and cerebral	P01034	CST3	Hs.304682
NA	NA	-0.354124	-5.121	1 2	0.581612	0.956028	0.434424	-0.065	0.7	-0.068	0.749	1	0.83	-0.29307	-4.301	1 2	0.609223	7.81675	0.000502802	0.174	0.993	0.144	0.759	NA	NA	-0.467985	-6.423	1 2	0.615495	-0.970132	0.565428	-0.055	0.424	-0.024	0.155	NA	NA	-9.049	1.32377	0.185581	rs7557190	100141973_TGI_at	NM_080653	REFSEQ	human	Homo sapiens ATPase, H+ transporting, lysosomal 31kDa, V1 subunit	Q96A05	ATP6V1E2	Hs.437691; Hs.659656
NA	NA	NA	NA	4 3	0.401309	-2.853	0.0299339	-0.107	1.452	-0.084	1.004	NA	NA	NA	NA	4 3	0.423089	-3.16222	0.196183	-0.037	0.137	-0.028	0.1	NA	NA	-0.458513	-6.491	4 3	0.429088	-4.50518	0.00717354	0.062	0.5	0.07	0.587	1	0.88	-6.902	-3.47685	0.000507339	rs6026274	100126314_TGI_at	AK023241	GENBANK	human	Homo sapiens cDNA FLJ13179 fis, clone NT2RP3003918, highly similar to Homo sapiens VAMP-associated protein B (VAP-B) mRNA.	O95292	VAPB	Hs.182625
NA	NA	NA	NA	3 1	0.626628	4.25144	0.000920302	-0.005	0.035	-0.005	0.036	NA	NA	NA	NA	3 1	0.612663	5.11735	0.0438973	-0.029	0.103	-0.036	0.133	NA	NA	NA	NA	3 1	0.60669	0.767842	0.677785	-0.016	0.096	0.015	0.089	1	0.88	6.158	3.54237	0.000396543	rs4035021	100131345_TGI_at	NM_003879	REFSEQ	human	Homo sapiens CASP8 and FADD-like apoptosis regulator (CFLAR), mRNA.	O15519	CFLAR	Hs.390736
NA	NA	-0.44425	-6.9	2 4	0.540617	-0.994387	0.407739	0.067	0.722	0.065	0.692	NA	NA	NA	NA	2 4	0.509307	6.8274	0.011842	0.062	0.252	0.05	0.194	1	0.86	-0.38072	-5.331	2 4	0.498611	5.59574	0.000914937	-0.001	0.007	0.039	0.277	NA	NA	-9.266	1.21814	0.22317	rs7040270	100124922_TGI_at	NM_018465	REFSEQ	human	Homo sapiens chromosome 9 open reading frame 46 (C9orf46), mRNA.	Q9HBL7	C9orf46	Hs.584242
NA	NA	NA	NA	3 1	0.467554	-3.97699	0.00089861	-0.034	0.299	-0.039	0.352	NA	NA	NA	NA	3 1	0.470144	0.822509	0.738888	-0.03	0.108	0.006	0.021	NA	NA	NA	NA	3 1	0.481305	-2.34203	0.161023	-0.114	1.191	-0.112	1.146	1	0.89	-4.227	-3.45232	0.000555789	rs2905346	100129412_TGI_at	ENST00000325042	ENSEMBL	human	Sim:BC027978, Homo sapiens hypothetical LOC541472, mRNA (cDNA clone IMAGE:3463942), complete cds. (e=0.0,score=2692,100% ID over 1358nt [query=1358nt], plus strand, blastn,Homo sapiens)			Hs.512234
NA	NA	NA	NA	3 1	0.899106	6.26679	0.00117034	0.048	0.455	0.064	0.686	NA	NA	NA	NA	3 1	0.915292	9.51697	0.0300191	0.074	0.311	0.103	0.476	NA	NA	NA	NA	3 1	0.91691	1.5925	0.640788	0.002	0.013	0.011	0.065	1	0.93	4.116	3.5767	0.000347955	rs632326	100123136_TGI_at	NM_080747	REFSEQ	human	Homo sapiens keratin 72 (KRT72), mRNA.	Q14CN4	KRT72	Hs.662013
NA	NA	NA	NA	1 3	0.946793	-9.71817	0.000298956	0.018	0.141	0.022	0.175	NA	NA	NA	NA	NA	NA	NA	NA	-0.08	0.345	-0.116	0.559	NA	NA	NA	NA	1 3	0.939668	-0.950663	0.814662	-0.088	0.812	-0.08	0.709	1	0.91	4.153	-3.41233	0.000644099	rs10498624	100127145_TGI_at	NM_145231	REFSEQ	human	Homo sapiens chromosome 14 open reading frame 143 (C14orf143),	Q9BUY7	C14orf143	Hs.123232
NA	NA	NA	NA	3 1	0.378642	4.27421	0.000473257	-0.021	0.167	-0.02	0.158	NA	NA	NA	NA	3 1	0.347297	3.87418	0.115645	-0.051	0.2	-0.089	0.396	NA	NA	NA	NA	3 1	0.348466	-0.680377	0.713754	-0.006	0.032	-0.013	0.078	1	0.89	-4.404	3.33927	0.00083998	rs4953285	100123207_TGI_at	BC029576	GENBANK	human	Homo sapiens cDNA clone IMAGE:5267735.	Q02156	PRKCE	Hs.580351
NA	NA	-0.508425	-7.515	2 1	0.313844	0.354654	0.777608	-0.034	0.301	-0.029	0.247	1	0.89	-0.458458	-5.976	2 1	0.315534	-9.13151	0.00088795	-0.073	0.308	-0.067	0.274	NA	NA	-0.524582	-7.032	2 1	0.317808	2.03413	0.267072	0.078	0.686	0.075	0.64	NA	NA	-11.882	0.0764898	0.939029	rs9321476	100121621_TGI_at	NM_170771	REFSEQ	human	Homo sapiens aldehyde dehydrogenase 8 family, member A1 (ALDH8A1),	Q9H2A2	ALDH8A1	Hs.486520
1	0.93	0.405529	5.203	2 4	0.744689	4.60119	0.000993095	0.02	0.162	0.031	0.269	NA	NA	0.543742	6.627	2 4	0.717233	0.459537	0.876835	-0.01	0.033	-0.024	0.085	NA	NA	NA	NA	2 4	0.723421	-0.707636	0.71237	0.159	2	0.161	2.035	NA	NA	8.633	2.72513	0.00642766	rs974699	100145619_TGI_at	CR936742	GENBANK	human		Q9C0E8	KIAA1715	Hs.209561
NA	NA	-0.528005	-8.299	2 4	0.462171	1.78177	0.133166	0.031	0.267	0.036	0.318	NA	NA	-0.385792	-5.535	2 4	0.509709	-2.25904	0.333301	0.033	0.121	-0.01	0.032	1	0.97	-0.478649	-6.835	2 4	0.480534	-6.77221	0.000129329	-0.084	0.76	-0.102	1.001	NA	NA	-12.037	-0.459235	0.646066	rs3850853	100138187_TGI_at	ENST00000372237	ENSEMBL	human		Q6P2H8	FLJ22353	Hs.22157
1	0.93	-0.388781	-4.883	2 4	0.744689	4.60119	0.000993095	-0.013	0.098	-0.014	0.104	NA	NA	NA	NA	2 4	0.717233	0.459537	0.876835	-0.198	1.216	-0.143	0.749	NA	NA	NA	NA	2 4	0.723421	-0.707636	0.71237	0.071	0.604	0.058	0.453	NA	NA	-6.583	2.72513	0.00642766	rs974699	100132952_TGI_at	NM_030650	REFSEQ	human	Homo sapiens KIAA1715 (KIAA1715), mRNA.	Q9C0E8	KIAA1715	Hs.209561
NA	NA	-0.631023	-5.684	4 2	0.907803	6.40178	0.00161548	-0.015	0.116	0.012	0.087	NA	NA	NA	NA	4 2	0.921117	7.79449	0.0878184	-0.059	0.238	-0.086	0.379	NA	NA	NA	NA	4 2	0.942466	0.655686	0.856687	-0.058	0.452	-0.026	0.173	1	0.89	-6.062	3.32895	0.000871728	rs11739840	100129380_TGI_at	ENST00000314957	ENSEMBL	human	Sim:BC046188, Homo sapiens, clone IMAGE:5561763, mRNA. (e=0.0,score=4668,99% ID over 2373nt [query=2379nt], plus strand, blastn,Homo sapiens)			Hs.655947
1	0.81	0.533937	6.123	3 1	0.828493	-6.4394	6.33012e-05	-0.025	0.21	0	0.003	NA	NA	NA	NA	3 1	0.884704	-6.37375	0.071053	0.048	0.186	0.074	0.313	NA	NA	NA	NA	3 1	0.869953	-5.17982	0.0574095	-0.034	0.235	0.004	0.025	NA	NA	6.02	-4.66492	3.0874e-06	rs2270859	100148334_TGI_at	NM_005213	REFSEQ	human	Homo sapiens cystatin A (stefin A) (CSTA), mRNA.	P01040	CSTA	Hs.518198
NA	NA	0.336391	4.586	4 2	0.717733	3.69	0.00524647	-0.126	1.878	-0.093	1.167	NA	NA	NA	NA	4 2	0.709988	0.639461	0.811449	-0.082	0.354	-0.077	0.329	NA	NA	NA	NA	4 2	0.735763	3.89977	0.043774	-0.066	0.537	-0.061	0.484	1	0.95	5.327	3.35524	0.000792971	rs1791067	100148953_TGI_at	NM_019856	REFSEQ	human	Homo sapiens myomesin 1, 185kDa (MYOM1), transcript variant 2,	P52179	MYOM1	Hs.464469
1	0.89	-0.68323	-5.066	2 4	0.937206	8.71699	0.000453855	0.036	0.314	0.045	0.419	NA	NA	-0.672109	-4.576	2 4	0.931766	6.07056	0.218871	-0.017	0.058	-0.04	0.149	NA	NA	-0.709895	-5.375	2 4	0.918984	-0.106885	0.97379	0.085	0.766	0.067	0.556	NA	NA	-8.686	3.21542	0.00130252	rs13357960	100140067_TGI_at	AK021855	GENBANK	human	Homo sapiens cDNA FLJ11793 fis, clone HEMBA1006130, weakly similar to SEL-10 PROTEIN.	Q9HAD4	WDR41	Hs.482573
1	0.92	NA	NA	2 4	0.669031	3.96761	0.00253094	-0.068	0.748	-0.081	0.957	NA	NA	NA	NA	2 4	0.6809	-3.02731	0.25863	0.011	0.036	-0.025	0.088	NA	NA	0.426458	5.513	2 4	0.693152	4.2816	0.0206206	0.153	1.89	0.096	0.915	1	0.94	6.729	3.42092	0.000624094	rs2846204	100132713_TGI_at	NM_002180	REFSEQ	human	Homo sapiens immunoglobulin mu binding protein 2 (IGHMBP2), mRNA.	P38935	IGHMBP2	Hs.503048
NA	NA	0.541007	7.905	3 2	0.408986	-2.9051	0.0244143	0.004	0.028	0.017	0.131	NA	NA	0.491078	7.066	3 2	0.415117	-3.72744	0.123288	0.016	0.053	0.028	0.1	NA	NA	0.485323	6.977	3 2	0.435442	-3.86026	0.0194276	-0.043	0.314	-0.01	0.06	1	0.97	12.681	-3.4163	0.000634773	rs4810131	100142482_TGI_at	AK124571	GENBANK	human	Homo sapiens cDNA FLJ42580 fis, clone BRACE3008491.
NA	NA	1.26681	8.169	NA	NA	NA	NA	0.035	0.311	0.024	0.199	NA	NA	1.09253	7.651	1 2	0.941631	-11.6038	0.0430058	-0.074	0.31	0.001	0.002	1	1	1.26821	8.578	1 2	0.941099	14.8272	0.00052609	0.126	1.376	0.154	1.907	NA	NA	14.033	2.06369	0.0390474	rs8059397	100121756_TGI_at	AK098143	GENBANK	human	Homo sapiens cDNA FLJ40824 fis, clone TRACH2011113.			Hs.192155
NA	NA	NA	NA	2 3	0.880615	-7.06775	0.000138032	0.069	0.76	0.055	0.556	NA	NA	NA	NA	2 3	0.893187	-1.26152	0.7561	0.137	0.704	0.241	1.647	NA	NA	NA	NA	2 3	0.868426	-1.67693	0.493698	0.022	0.14	0.073	0.622	1	0.94	4.561	-3.65456	0.000257626	rs7249792	100135326_TGI_at	NM_018443	REFSEQ	human	Homo sapiens zinc finger protein 302 (ZNF302), transcript variant	Q9NR11	ZNF302	Hs.436350
NA	NA	NA	NA	1 2	0.326216	-3.69174	0.00313118	-0.075	0.851	-0.071	0.781	NA	NA	NA	NA	1 2	0.314078	-1.81142	0.507985	0.1	0.456	0.116	0.563	NA	NA	NA	NA	1 2	0.292259	-4.38074	0.0284205	-0.092	0.865	-0.078	0.686	1	0.91	-4.815	-3.61052	0.000305587	rs2836907	100150913_TGI_at	NM_003720	REFSEQ	human	Homo sapiens proteasome (prosome, macropain) assembly chaperone 1	O95456	DSCR2	Hs.473838
NA	NA	NA	NA	3 1	0.637722	4.56817	0.00047302	0.097	1.255	0.09	1.123	NA	NA	NA	NA	3 1	0.626985	2.3392	0.362308	-0.035	0.13	0.005	0.016	NA	NA	NA	NA	3 1	0.62171	1.52312	0.436342	-0.011	0.063	-0.039	0.277	1	0.8	-5.686	3.62819	0.000285415	rs9880397	100162763_TGI_at	NM_153184	REFSEQ	human	Homo sapiens cell adhesion molecule 2 (CADM2), mRNA.	Q8N3J6	CADM2	Hs.164578
NA	NA	NA	NA	3 4	0.44209	3.94595	0.00137549	-0.026	0.213	-0.015	0.111	NA	NA	NA	NA	3 4	0.502166	-1.97661	0.403184	0.08	0.345	0.151	0.81	NA	NA	NA	NA	3 4	0.428512	3.41242	0.0660776	-0.096	0.922	-0.119	1.269	1	0.81	4.369	3.36142	0.000775417	rs6088765	100153440_TGI_at	BC105791	GENBANK	human	Sim:AB209400, Ubiquinol-cytochrome c reductase complex chaperone, CBP3 homolog (yeast) (e=0.0,score=1092,100% ID over 551nt [query=1416nt], plus strand, blastn,Homo sapiens)	Q9NVA1	C20orf44	Hs.714359
NA	NA	-0.412658	-5.031	1 3	0.804965	0.36705	0.806392	-0.028	0.237	-0.034	0.3	1	0.98	-0.41306	-4.828	1 3	0.737876	10.8169	0.00045617	-0.207	1.299	-0.165	0.924	NA	NA	-0.655518	-7.484	1 3	0.77921	-1.17701	0.575267	0.085	0.768	0.039	0.272	NA	NA	-9.916	0.712173	0.476358	rs12128653	100144721_TGI_at	NM_015203	REFSEQ	human	Homo sapiens KIAA0460 (KIAA0460), mRNA.	Q5VT52	KIAA0460	Hs.213666
NA	NA	NA	NA	4 2	0.315619	3.38989	0.0104675	-0.035	0.313	-0.048	0.467	NA	NA	NA	NA	4 2	0.287614	2.49309	0.36192	-0.224	1.468	-0.284	2.166	NA	NA	NA	NA	4 2	0.295893	4.0128	0.0335486	-0.034	0.233	-0.055	0.425	1	0.85	4.069	3.35407	0.000796333	rs8025217	100153986_TGI_at	NM_005928	REFSEQ	human	Homo sapiens milk fat globule-EGF factor 8 protein (MFGE8),	Q08431	MFGE8	Hs.3745
NA	NA	-0.667009	-4.614	NA	NA	NA	NA	-0.035	0.313	-0.036	0.323	NA	NA	NA	NA	3 1	0.914756	10.4881	0.0873886	0.32	2.681	0.316	2.593	NA	NA	NA	NA	3 1	0.93799	11.1092	0.00201079	0.073	0.625	0.084	0.752	1	0.85	-4.867	3.47455	0.000511718	rs12746973	100161630_TGI_at	NM_138278	REFSEQ	human	Homo sapiens BCL2/adenovirus E1B 19kD interacting protein like	Q7Z465	BNIPL	Hs.591473
NA	NA	0.373058	4.925	3 1	0.676292	-4.03116	0.00356868	-0.009	0.065	0.012	0.09	NA	NA	NA	NA	3 1	0.670613	-0.277595	0.918992	0.039	0.144	0.034	0.124	NA	NA	NA	NA	3 1	0.653838	-3.22596	0.062952	-0.003	0.016	-0.027	0.18	1	0.86	5.027	-3.40088	0.000671692	rs1249582	100130137_TGI_at	NM_001098515	REFSEQ	human	Homo sapiens MAS-related GPR, member F (MRGPRF), transcript variant	Q96AM1	MRGPRF	Hs.118513; Hs.602397
NA	NA	-0.431209	-5.188	4 3	0.793606	-3.64104	0.0133919	0.075	0.858	0.087	1.062	NA	NA	NA	NA	4 3	0.767546	-2.47138	0.390343	0.069	0.284	0.134	0.686	NA	NA	NA	NA	4 3	0.759388	-5.11976	0.010891	0.119	1.263	0.124	1.353	1	0.82	-5.551	-3.49201	0.000479404	rs6998596	100153819_TGI_at	NM_033512	REFSEQ	human	Homo sapiens TSPY-like 5 (TSPYL5), mRNA.	Q86VY4	TSPYL5	Hs.173094
NA	NA	0.560864	8.119	2 4	0.690361	0.779992	0.561922	0.061	0.643	0.065	0.693	NA	NA	0.516403	7.34	2 4	0.667475	-2.62861	0.291028	-0.031	0.111	0.029	0.106	1	0.87	0.666462	9.575	2 4	0.624652	7.01738	0.000139981	-0.001	0.007	0.036	0.249	NA	NA	14.462	2.00517	0.0449451	rs6511286	100121891_TGI_at	BX640982	GENBANK	human	Homo sapiens mRNA; cDNA DKFZp686M04222 (from clone DKFZp686M04222).	Q8IYN0	ZNF100	Hs.365142; Hs.535881
NA	NA	0.529949	8.098	4 2	0.450622	0.0695015	0.955131	0.072	0.801	0.063	0.67	1	0.98	0.396097	5.397	4 2	0.469317	8.51707	0.000749504	0.102	0.47	0.071	0.295	NA	NA	0.475829	6.58	4 2	0.458216	-0.392015	0.823651	0.109	1.113	0.119	1.263	NA	NA	11.715	0.683911	0.494031	rs2192838	100146322_TGI_at	ENST00000275358	ENSEMBL	human	Sim:XM_371878, PREDICTED: Homo sapiens hypothetical protein FLJ14712 (FLJ14712), mRNA. (e=0.0,score=6260,100% ID over 3158nt [query=3158nt], plus strand, blastn,Homo sapiens)		FLJ14712	Hs.669526
NA	NA	NA	NA	4 3	0.864128	5.50354	0.00160085	-0.127	1.908	-0.137	2.158	NA	NA	NA	NA	4 3	0.837354	6.73435	0.034295	0.047	0.18	0.003	0.011	NA	NA	NA	NA	4 3	0.853422	0.55726	0.826193	-0.038	0.266	-0.051	0.386	1	0.8	-4.122	3.40557	0.000660257	rs2466183	100153254_TGI_at	ENST00000381048	ENSEMBL	human	Sim:NM_147187, Homo sapiens tumor necrosis factor receptor superfamily, member 10b (TNFRSF10B), transcript variant 2, mRNA. (e=0.0,score=3408,99% ID over 1722nt [query=1723nt], plus strand, blastn,Homo sapiens)	O14763	TNFRSF10B	Hs.521456
NA	NA	NA	NA	2 4	0.785103	4.10503	0.00384853	-0.029	0.246	-0.049	0.478	NA	NA	NA	NA	2 4	0.719962	-1.95739	0.487889	0.084	0.367	0.092	0.413	NA	NA	NA	NA	2 4	0.754173	6.06163	0.00395177	0.085	0.77	0.086	0.782	1	0.88	-4.087	3.57883	0.000345142	rs8111290	100130478_TGI_at	NM_006149	REFSEQ	human	Homo sapiens lectin, galactoside-binding, soluble, 4 (galectin 4)	P56470	LGALS4	Hs.5302
NA	NA	1.53077	12.541	4 2	0.0591017	-7.94279	0.00282102	-0.038	0.341	-0.025	0.204	NA	NA	1.06078	5.583	NA	NA	NA	NA	-0.034	0.124	-0.019	0.068	NA	NA	1.44148	10.255	4 2	0.0616438	-5.33293	0.152131	0.079	0.692	0.036	0.251	1	0.97	17.121	-3.31137	0.000928392	rs4254706	100125267_TGI_at	ENST00000309027	ENSEMBL	human		O00461	GOLPH4	Hs.143600
1	0.8	0.661212	9.676	1 3	0.375887	-4.65061	0.000360428	-0.037	0.327	-0.038	0.343	NA	NA	0.48373	6.848	1 3	0.350728	-2.93407	0.250348	0.073	0.307	0.066	0.27	NA	NA	0.401887	5.141	1 3	0.389047	0.7678	0.702018	-0.135	1.546	-0.108	1.089	1	0.93	12.76	-3.3281	0.000874399	rs6738969	100127764_TGI_at	NM_001017927	REFSEQ	human	Homo sapiens hypothetical protein LOC130355 (LOC130355), mRNA.	Q3KRA6	LOC130355	Hs.99488
NA	NA	NA	NA	4 2	0.814648	-0.487371	0.753753	0.035	0.307	0.036	0.318	1	0.94	0.448866	4.325	4 2	0.851419	-12.9536	0.000229043	0.058	0.23	0.111	0.524	NA	NA	0.506362	4.945	4 2	0.834179	-1.97375	0.424885	-0.035	0.24	-0.046	0.337	NA	NA	7.403	-1.26085	0.207362	rs8137658	100147661_TGI_at	BX538181	GENBANK	human	Homo sapiens mRNA; cDNA DKFZp686K15188 (from clone DKFZp686K15188).			Hs.148656; Hs.709613
NA	NA	0.632979	7.548	3 2	0.814751	-0.49688	0.749332	-0.129	1.964	-0.097	1.245	1	0.96	0.504957	4.845	3 2	0.851225	-12.9312	0.00023674	-0.023	0.082	0	0.001	NA	NA	0.539184	5.241	3 2	0.834468	-2.07025	0.402905	-0.052	0.4	-0.039	0.276	NA	NA	10.386	-1.27893	0.200921	rs3827319	100158834_TGI_at	NM_016449	REFSEQ	human	Homo sapiens hypothetical protein LOC51233 (LOC51233), mRNA.		LOC51233	Hs.517466
NA	NA	-0.475452	-6.317	4 3	0.732342	1.19325	0.389327	0.062	0.656	0.047	0.443	1	0.91	-0.558261	-7.617	4 3	0.713898	8.5761	0.000781722	0.1	0.457	0.134	0.681	NA	NA	-0.527605	-6.594	4 3	0.720933	-3.42971	0.0848324	-0.098	0.946	-0.061	0.49	NA	NA	-11.863	0.905612	0.365141	rs2124047	100129835_TGI_at	AF424541	ENTREZ	human	hypothetical LOC401491			Hs.416043
NA	NA	NA	NA	1 2	0.326216	-3.69174	0.00313118	0.055	0.547	0.056	0.563	NA	NA	NA	NA	1 2	0.314078	-1.81142	0.507985	-0.088	0.388	-0.053	0.208	NA	NA	NA	NA	1 2	0.292259	-4.38074	0.0284205	0.048	0.362	0.003	0.017	1	0.87	-4.275	-3.61052	0.000305587	rs2836907	100146902_TGI_at	NM_033656	REFSEQ	human	Homo sapiens bromodomain and WD repeat domain containing 1 (BRWD1),	Q9NSI6	BRWD1	Hs.654740
NA	NA	NA	NA	4 1	0.699806	0.316076	0.805588	-0.019	0.145	-0.02	0.154	NA	NA	NA	NA	4 1	0.641265	-0.533966	0.836759	-0.213	1.36	-0.246	1.707	1	0.94	0.344257	4.505	4 1	0.675393	6.44723	0.000279204	0.033	0.227	0.039	0.276	NA	NA	6.83	1.85317	0.0638577	rs11185519	100157799_TGI_at	AF086176	GENBANK	human	Homo sapiens full length insert cDNA clone ZB95G04.
NA	NA	NA	NA	4 3	0.632383	3.79826	0.00362629	-0.012	0.087	-0.013	0.097	NA	NA	NA	NA	4 3	0.598539	-0.666988	0.80211	0.101	0.467	0.097	0.441	1	0.95	NA	NA	4 3	0.617748	4.0692	0.0311667	0.005	0.03	0.029	0.192	1	0.8	4.95	3.42157	0.000622597	rs340313	100153916_TGI_at	AK097794	GENBANK	human	Homo sapiens cDNA FLJ40475 fis, clone TESTI2042946.
NA	NA	-0.479916	-4.564	2 4	0.884918	-5.2043	0.00487821	0.019	0.148	0.027	0.227	NA	NA	NA	NA	2 4	0.86979	-6.49606	0.0863234	0.109	0.514	0.093	0.416	NA	NA	NA	NA	2 4	0.886167	-3.0247	0.285612	0.046	0.342	0.034	0.238	1	0.82	-4.774	-3.30635	0.000945212	rs2313725	100138360_TGI_at	NM_032995	REFSEQ	human	Homo sapiens Rho guanine nucleotide exchange factor (GEF) 4	Q9NR80	ARHGEF4	Hs.469935
NA	NA	NA	NA	NA	NA	NA	NA	-0.064	0.674	-0.037	0.325	NA	NA	NA	NA	3 1	0.914756	10.4881	0.0873886	0.118	0.572	0.116	0.559	NA	NA	NA	NA	3 1	0.93799	11.1092	0.00201079	-0.021	0.133	0	0.002	1	0.85	-4.889	3.47455	0.000511718	rs12746973	100156777_TGI_at	NM_018997	REFSEQ	human	Homo sapiens mitochondrial ribosomal protein S21 (MRPS21), nuclear	P82921	MRPS21	Hs.405880
NA	NA	-0.657041	-6.629	2 4	0.868216	-0.938063	0.598257	-0.06	0.625	-0.055	0.554	1	0.92	-0.576181	-4.61	2 4	0.912686	15.6656	0.000640319	-0.021	0.072	0.014	0.047	NA	NA	-0.550347	-4.945	2 4	0.871859	0.986604	0.702288	0.06	0.475	0.057	0.446	NA	NA	-9.453	0.168057	0.866538	rs11749648	100142366_TGI_at	BU687783	DBEST	human	Sim:AK126844, Homo sapiens cDNA FLJ44896 fis, clone BRAMY3001409. (e=8e-05,score=52.0,100% ID over 26nt [query=717nt], plus strand, blastn,Homo sapiens)			Hs.711993
NA	NA	NA	NA	1 3	0.907927	6.5761	0.00362578	0.023	0.186	0.05	0.493	NA	NA	NA	NA	1 3	0.911408	1.12608	0.785702	-0.12	0.586	-0.127	0.634	NA	NA	NA	NA	1 3	0.912329	5.63106	0.0440669	0.078	0.679	0.085	0.764	1	0.82	4.048	3.49834	0.000468156	rs986475	100162706_TGI_at	D83543	GENBANK	human	Homo sapiens mRNA expressed in skin fibroblast.
NA	NA	0.662251	10.403	4 2	0.60297	0.817407	0.515549	0.005	0.039	0.003	0.018	NA	NA	0.602295	9.446	4 2	0.56191	-1.57776	0.511235	0.2	1.228	0.2	1.227	1	0.93	0.558316	7.531	4 2	0.526078	6.25905	0.000493663	0.284	5.542	0.265	4.853	NA	NA	15.928	1.9268	0.0540042	rs6668514	100161086_TGI_at	AW449132	DBEST	human	Sim:CB852316, GENE CAPN8 (e=9e-75,score=281,92% ID over 198nt [query=492nt], plus strand, blastn)			Hs.291487; Hs.670199
NA	NA	NA	NA	1 3	0.84482	5.80596	0.000357486	-0.028	0.232	-0.02	0.162	NA	NA	NA	NA	1 3	0.848483	-0.0484578	0.98877	0.014	0.047	0.011	0.036	NA	NA	NA	NA	1 3	0.837792	1.01472	0.672257	0.029	0.191	0.044	0.316	1	0.91	4.561	3.35658	0.000789124	rs4803223	100145546_TGI_at	NM_001001414	REFSEQ	human	Homo sapiens similar to F-box only protein 2 (LOC342897), mRNA.		LOC342897	Hs.451636
NA	NA	0.367606	5.221	2 3	0.392443	-2.8144	0.0308949	-0.032	0.275	-0.02	0.155	NA	NA	0.381358	5.344	2 3	0.412621	-3.04511	0.206887	-0.155	0.842	-0.137	0.707	NA	NA	NA	NA	2 3	0.423941	-4.293	0.00928581	0.088	0.803	0.087	0.798	1	0.94	7.467	-3.42183	0.000622003	rs2268917	100144515_TGI_at	NM_004738	REFSEQ	human	Homo sapiens VAMP (vesicle-associated membrane protein)-associated	O95292	VAPB	Hs.182625
NA	NA	0.74491	10.399	2 4	0.790558	4.16208	0.00409273	-0.057	0.585	-0.081	0.959	NA	NA	0.603113	7.359	2 4	0.780297	1.27014	0.662881	-0.121	0.593	-0.064	0.262	NA	NA	0.716318	8.304	2 4	0.810837	6.82993	0.00147319	-0.065	0.535	-0.061	0.492	1	0.98	15.155	3.93874	8.19094e-05	rs4367416	100130028_TGI_at	BG900234	DBEST	human	Transcribed locus
NA	NA	NA	NA	3 1	0.790322	1.84591	0.209421	-0.047	0.445	-0.052	0.511	NA	NA	NA	NA	3 1	0.763493	-1.8781	0.50788	-0.09	0.4	-0.106	0.494	1	0.82	0.446784	4.465	3 1	0.816538	-7.67842	0.000754151	-0.011	0.063	-0.078	0.676	NA	NA	NA	-0.319573	0.749292	rs4822	100122052_TGI_at	AK093594	GENBANK	human	Homo sapiens cDNA FLJ36275 fis, clone THYMU2003166.
NA	NA	NA	NA	1 4	0.690105	-2.64358	0.0501574	0.037	0.329	0.068	0.735	NA	NA	NA	NA	1 4	0.677318	1.58214	0.57999	-0.018	0.064	0.018	0.062	1	0.97	-0.363595	-4.287	1 4	0.697203	-7.60776	0.000177041	0.036	0.252	0.059	0.47	NA	NA	NA	-3.15717	0.00159308	rs1381090	100145504_TGI_at	AI634844	DBEST	human	Sim:CR592480, full-length cDNA clone CL0BB011ZH07 of Neuroblastoma of Homo sapiens (human). (e=1e-09,score=67.9,87% ID over 61nt [query=559nt], plus strand, blastn,Homo sapiens)
NA	NA	0.301628	4.156	4 3	0.632383	3.79826	0.00362629	-0.029	0.245	-0.025	0.206	NA	NA	NA	NA	4 3	0.598539	-0.666988	0.80211	0.065	0.265	0.1	0.461	1	0.89	NA	NA	4 3	0.617748	4.0692	0.0311667	-0.015	0.089	0.012	0.073	1	0.86	5.991	3.42157	0.000622597	rs340313	100305399_TGI_at	CN266276	DBEST	human
NA	NA	-0.635351	-5.126	3 4	0.906507	6.56348	0.00361101	-0.021	0.165	0.008	0.06	NA	NA	-0.665847	-5.438	3 4	0.911394	1.12793	0.785382	-0.238	1.62	-0.18	1.051	NA	NA	NA	NA	3 4	0.912418	5.64909	0.0439177	-0.024	0.153	-0.062	0.494	1	0.83	-8.509	3.50007	0.000465144	rs769178	100308499_TGI_at	BF959056	DBEST	human		O95670	ATP6V1G2	Hs.249227
1	0.8	0.4638	5.017	4 2	0.827389	-5.52883	0.000709604	-0.106	1.424	-0.107	1.463	NA	NA	NA	NA	4 2	0.805806	1.46482	0.644225	-0.07	0.288	-0.058	0.232	NA	NA	NA	NA	4 2	0.834247	-0.897722	0.712184	-0.125	1.369	-0.153	1.871	NA	NA	5.602	-3.04747	0.00230778	rs10092747	100312124_TGI_at	AK023916	GENBANK	human		Q8TB45	DEPDC6	Hs.112981
1	0.88	0.473892	7.141	3 4	0.44209	3.94595	0.00137549	-0.082	0.977	-0.096	1.239	NA	NA	0.421534	6.395	3 4	0.502166	-1.97661	0.403184	-0.183	1.073	-0.169	0.958	NA	NA	0.499378	6.629	3 4	0.428512	3.41242	0.0660776	0.036	0.249	0.036	0.247	1	0.88	11.573	3.36142	0.000775417	rs6088765	100300977_TGI_at	NM_178025	REFSEQ	human	Sim:AY138815, Homo sapiens gamma-glutamyltranspeptidase-like 3 protein isoform B (GGTL3B) mRNA, complete cds. (e=0.0,score=2900,99% ID over 1472nt [query=1514nt], plus strand, blastn,Homo sapiens)	Q9UJ14	GGTL3	Hs.433738
NA	NA	0.446153	6.899	1 3	0.503005	-0.00924744	0.993972	-0.05	0.485	-0.022	0.18	NA	NA	0.409186	6.104	1 3	0.514536	-2.62685	0.273294	-0.009	0.031	-0.066	0.271	1	0.81	0.374092	5.085	1 3	0.473415	-6.08063	0.000581516	-0.096	0.915	-0.116	1.209	NA	NA	10.519	-1.73525	0.0826963	rs1545257	100303271_TGI_at	NM_001040710	REFSEQ	human	Homo sapiens hypothetical LOC653140 (FLJ30851), mRNA.			Hs.467868
NA	NA	NA	NA	4 2	0.717733	3.69	0.00524647	-0.098	1.269	-0.107	1.453	NA	NA	NA	NA	4 2	0.709988	0.639461	0.811449	0.033	0.123	0.028	0.101	NA	NA	NA	NA	4 2	0.735763	3.89977	0.043774	-0.052	0.396	-0.033	0.223	1	0.97	6.191	3.35524	0.000792971	rs1791067	100312567_TGI_at	AI678086	DBEST	human
NA	NA	NA	NA	4 3	0.834004	-5.2623	0.00182568	0.066	0.711	0.055	0.553	NA	NA	NA	NA	4 3	0.76335	6.02694	0.0413766	-0.098	0.446	-0.146	0.769	NA	NA	NA	NA	4 3	0.786301	-6.87985	0.00121995	-0.075	0.64	-0.045	0.33	1	0.83	-4.234	-3.66643	0.000245958	rs1016373	100312175_TGI_at	AK022131	GENBANK	human		O76003	TXNL2	Hs.42644
1	0.97	1.16786	8.331	1 3	0.94087	8.76573	0.000701678	-0.088	1.076	-0.085	1.033	NA	NA	NA	NA	NA	NA	NA	NA	-0.029	0.105	-0.025	0.089	NA	NA	0.791345	5.446	1 3	0.941085	-3.85052	0.3153	-0.008	0.048	0.002	0.01	NA	NA	10.374	2.67885	0.00738755	rs17415601	100309580_TGI_at	BC035659	GENBANK	human	Homo sapiens hypothetical protein LOC642032, mRNA (cDNA clone IMAGE:5588965), partial cds.
1	0.98	-0.55187	-4.708	3 4	0.88207	-7.21462	0.000582678	0.015	0.119	0.038	0.346	NA	NA	NA	NA	3 4	0.891631	-4.44412	0.290685	-0.217	1.404	-0.142	0.741	NA	NA	NA	NA	3 4	0.883075	-1.19093	0.687749	0.008	0.044	-0.034	0.23	1	0.87	-5.644	-3.41271	0.000643199	rs1735725	100306838_TGI_at	BU580655	DBEST	human		O15394	NCAM2	Hs.473450
NA	NA	NA	NA	4 3	0.679319	3.79431	0.00328417	-0.079	0.923	-0.085	1.027	NA	NA	NA	NA	4 3	0.657561	3.1975	0.222663	-0.208	1.312	-0.226	1.488	NA	NA	NA	NA	4 3	0.639564	2.21736	0.217377	0.009	0.056	0.025	0.161	1	0.87	-4.125	3.36407	0.000768012	rs1901821	100307717_TGI_at	BM674826	DBEST	human		Q13153	PAK1	Hs.435714
NA	NA	0.459481	7.034	1 3	0.555767	-1.53856	0.199916	-0.091	1.136	-0.102	1.349	NA	NA	0.392096	5.499	1 3	0.509492	0.730683	0.769361	-0.179	1.043	-0.16	0.877	1	0.96	0.461839	6.571	1 3	0.543004	5.57783	0.000912715	0.072	0.608	0.053	0.406	NA	NA	11.068	0.444824	0.656447	rs9343	100302663_TGI_at	NM_005017	REFSEQ	human	Homo sapiens phosphate cytidylyltransferase 1, choline, alpha	P49585	PCYT1A	Hs.435767
NA	NA	-0.535474	-5.219	2 4	0.873591	0.203873	0.915444	0.015	0.117	0.015	0.116	NA	NA	NA	NA	2 4	0.883443	6.45781	0.119722	0.148	0.785	0.161	0.887	1	0.97	-0.744184	-7.229	2 4	0.879514	8.54031	0.00092987	0.08	0.709	0.119	1.265	NA	NA	-9.144	1.9839	0.0472671	rs1969759	100309840_TGI_at	BC020212	GENBANK	human		Q5T653	Mrpl2	Hs.55041
NA	NA	NA	NA	2 4	0.459811	1.08699	0.382313	-0.019	0.149	-0.016	0.125	NA	NA	NA	NA	2 4	0.461164	3.51085	0.159077	-0.014	0.049	-0.019	0.068	1	0.96	0.358782	4.68	2 4	0.446575	6.13206	0.000695032	-0.201	2.964	-0.176	2.369	NA	NA	5.686	2.52035	0.0117238	rs1714524	100304858_TGI_at	DA823417	DBEST	human		P58340	MLF1	Hs.85195
NA	NA	0.392176	5.056	4 2	0.224596	0.673483	0.62901	-0.071	0.795	-0.081	0.952	NA	NA	NA	NA	4 2	0.211165	2.28109	0.43339	-0.034	0.123	-0.058	0.233	1	0.9	0.529765	6.035	4 2	0.212329	7.22751	0.000750482	-0.033	0.228	-0.031	0.212	NA	NA	7.848	1.90585	0.0566691	rs9911523	100312153_TGI_at	AK022913	GENBANK	human	Homo sapiens cDNA FLJ12851 fis, clone NT2RP2003401, weakly similar to UBIQUITIN CARBOXYL-TERMINAL HYDROLASE DUB-1 (EC 3.1.2.15).	Q9P275	USP36	Hs.464243
NA	NA	0.369257	4.183	1 2	0.771216	3.04526	0.051533	0.001	0.01	-0.024	0.193	NA	NA	NA	NA	1 2	0.771295	3.38238	0.238432	0.132	0.667	0.135	0.69	NA	NA	0.389841	4.466	1 2	0.755533	6.64377	0.00112341	0.094	0.889	0.085	0.77	1	0.81	6.563	3.53185	0.000412668	rs11761408	100306259_TGI_at	BX537624	GENBANK	human		Q9Y4P8	WIPI2	Hs.122363
NA	NA	-0.576621	-6.274	3 1	0.846385	0.455437	0.780532	0.04	0.367	0.051	0.494	NA	NA	NA	NA	3 1	0.868953	0.935298	0.794388	0.048	0.186	0.056	0.221	1	0.94	-0.54104	-4.861	3 1	0.846574	8.70299	0.000345252	-0.01	0.057	0.014	0.088	NA	NA	-8.578	1.77779	0.0754388	rs11615947	100310737_TGI_at	AV739678	DBEST	human
NA	NA	0.634509	5.053	3 4	0.906507	6.56348	0.00361101	0.061	0.634	0.044	0.417	NA	NA	NA	NA	3 4	0.911394	1.12793	0.785382	-0.104	0.483	-0.047	0.181	NA	NA	0.668425	4.99	3 4	0.912418	5.64909	0.0439177	0.089	0.821	0.067	0.549	1	0.85	7.423	3.50007	0.000465144	rs769178	100304001_TGI_at	ENST00000376222	ENSEMBL	human	Sim:AK094237, Homo sapiens cDNA FLJ36918 fis, clone BRACE2003954, highly similar to MHC class I chain-related gene A protein. (e=0.0,score=3699,98% ID over 1985nt [query=2070nt], plus strand, blastn,Homo sapiens)
1	0.83	0.466068	6.12	4 2	0.784547	4.73351	0.000976936	0.111	1.54	0.117	1.669	NA	NA	0.390578	5.004	4 2	0.707928	3.94422	0.12516	0.032	0.115	0.043	0.165	NA	NA	0.6864	8.915	4 2	0.757716	-0.0908403	0.963058	-0.065	0.535	-0.018	0.114	NA	NA	11.586	3.19528	0.00139697	rs9258074	100300348_TGI_at	X81001	GENBANK	human	H.sapiens HCG II mRNA.			Hs.661100
NA	NA	-0.546479	-7.482	4 3	0.74469	0.0692964	0.960179	-0.019	0.149	-0.025	0.202	1	0.86	-0.477308	-6.205	4 3	0.708729	-9.26174	0.000760816	-0.047	0.182	-0.055	0.215	NA	NA	-0.452445	-5.75	4 3	0.68497	1.92488	0.307851	0.058	0.454	0.026	0.169	NA	NA	-11.28	-0.244247	0.80704	rs7314152	100312972_TGI_at	AF455816	GENBANK	human	Sim:NM_206914, Family with sequence similarity 119, member B (e=0.0,score=4262,100% ID over 2565nt [query=2624nt], plus strand, blastn)	Q96AZ1	FAM119B	Hs.632720
NA	NA	NA	NA	3 1	0.626628	4.25144	0.000920302	-0.015	0.114	0.005	0.032	NA	NA	NA	NA	3 1	0.612663	5.11735	0.0438973	-0.083	0.362	-0.111	0.527	NA	NA	NA	NA	3 1	0.60669	0.767842	0.677785	-0.037	0.257	0.009	0.053	1	0.92	-4.656	3.54237	0.000396543	rs4035021	100309674_TGI_at	BC031603	GENBANK	human	Sim:AK124115, Amyotrophic lateral sclerosis 2 (juvenile) chromosome region, candidate 12 (e=0.0,score=1271,99% ID over 1722nt [query=1861nt], plus strand, blastn,Homo sapiens)		ALS2CR12	Hs.107944
NA	NA	0.911492	13.539	2 4	0.769343	-4.54631	0.00158703	-0.072	0.81	-0.093	1.176	NA	NA	0.518016	5.944	2 4	0.792404	-0.0951932	0.974372	0.026	0.094	0.029	0.106	NA	NA	0.790683	9.587	2 4	0.77389	-2.8728	0.181954	0.03	0.202	0.016	0.097	1	0.9	17.496	-3.35944	0.000780996	rs6048956	100307577_TGI_at	BM845621	DBEST	human		P01034	CST3	Hs.304682
1	0.91	1.08498	7.76	1 3	0.94087	8.76573	0.000701678	-0.111	1.539	-0.087	1.051	NA	NA	0.818394	4.824	NA	NA	NA	NA	-0.049	0.191	-0.043	0.165	NA	NA	0.803298	5.627	1 3	0.941085	-3.85052	0.3153	0.077	0.666	0.044	0.317	NA	NA	10.649	2.67885	0.00738755	rs17415601	100303994_TGI_at	ENST00000376881	ENSEMBL	human		Q9NU63	ZFP57	Hs.156326
NA	NA	NA	NA	1 2	0.326216	-3.69174	0.00313118	0.105	1.421	0.111	1.531	NA	NA	NA	NA	1 2	0.314078	-1.81142	0.507985	-0.028	0.1	0.025	0.089	NA	NA	NA	NA	1 2	0.292259	-4.38074	0.0284205	0.085	0.764	0.047	0.347	1	0.93	-5.508	-3.61052	0.000305587	rs2836907	100307724_TGI_at	BM670772	DBEST	human		Q9NSI6	BRWD1	Hs.654740
NA	NA	NA	NA	3 1	0.431442	-4.26062	0.000582151	-0.144	2.34	-0.13	1.981	NA	NA	NA	NA	3 1	0.457498	-2.83786	0.282898	-0.027	0.095	-0.008	0.027	NA	NA	NA	NA	3 1	0.446574	-1.19177	0.492363	-0.014	0.086	0.007	0.043	1	0.86	4.271	-3.52461	0.000424107	rs243342	100308686_TGI_at	BF222794	DBEST	human		Q13111	CHAF1A	Hs.79018
NA	NA	-0.741664	-5.117	NA	NA	NA	NA	-0.038	0.342	-0.034	0.295	1	0.97	-0.53294	-4.821	3 1	0.914756	10.4881	0.0873886	0.072	0.3	0.089	0.395	NA	NA	-0.698301	-4.764	3 1	0.93799	11.1092	0.00201079	-0.106	1.055	-0.059	0.472	1	0.88	-8.15	3.47455	0.000511718	rs12746973	100307575_TGI_at	BM853911	DBEST	human		P82921	MRPS21	Hs.405880
NA	NA	NA	NA	3 1	0.94371	9.69529	0.00217317	-0.062	0.648	-0.041	0.381	NA	NA	-0.618453	-4.389	3 1	0.935985	5.84124	0.201058	-0.115	0.55	-0.144	0.755	NA	NA	NA	NA	NA	NA	NA	NA	0.054	0.42	0	0	1	0.96	-4.843	3.31733	0.000908831	rs7766094	100304000_TGI_at	ENST00000376242	ENSEMBL	human	Sim:AY484516, Homo sapiens psoriasis susceptibility 1 candidate 3 (PSORS1C3) mRNA, complete cds. (e=0.0,score=1152,99% ID over 590nt [query=593nt], plus strand, blastn,Homo sapiens)			Hs.670091
NA	NA	0.492554	7.528	1 2	0.581612	0.956028	0.434424	-0.053	0.525	-0.053	0.529	1	0.86	0.389819	5.801	1 2	0.609223	7.81675	0.000502802	-0.03	0.107	-0.081	0.35	NA	NA	0.506664	7.092	1 2	0.615495	-0.970132	0.565428	-0.073	0.618	-0.047	0.348	NA	NA	11.764	1.32377	0.185581	rs7557190	100302337_TGI_at	NM_014171	REFSEQ	human	Homo sapiens cysteine-rich PDZ-binding protein (CRIPT), mRNA.	Q96PQ7	CRIPT	Hs.133998
NA	NA	-0.979931	-18.678	2 4	0.598845	1.059	0.392222	0.049	0.48	0.056	0.567	NA	NA	-0.866535	-14.613	2 4	0.588299	0.292357	0.905986	-0.057	0.225	-0.021	0.073	1	0.97	-1.00506	-18.037	2 4	0.560379	6.21676	0.000600348	-0.069	0.571	-0.047	0.344	NA	NA	-29.77	2.22321	0.0262017	rs6511291	100312460_TGI_at	AI819964	DBEST	human		Q8IYN0	ZNF100	Hs.365142; Hs.535881
NA	NA	-0.31419	-4.586	3 4	0.44209	3.94595	0.00137549	0.076	0.861	0.101	1.331	NA	NA	NA	NA	3 4	0.502166	-1.97661	0.403184	-0.119	0.581	-0.065	0.268	NA	NA	NA	NA	3 4	0.428512	3.41242	0.0660776	0.08	0.7	0.065	0.527	1	0.87	-6.668	3.36142	0.000775417	rs6088765	100307620_TGI_at	BM742377	DBEST	human		Q96J02	Itch	Hs.632272
NA	NA	0.438552	6.47	3 1	0.431442	-4.26062	0.000582151	-0.084	1.014	-0.098	1.277	NA	NA	NA	NA	3 1	0.457498	-2.83786	0.282898	0.001	0.005	0.031	0.111	NA	NA	NA	NA	3 1	0.446574	-1.19177	0.492363	0	0	-0.011	0.063	1	0.91	7.709	-3.52461	0.000424107	rs243342	100310092_TGI_at	BC008288	GENBANK	human		Q9BZV1	UBXD1	Hs.435255; Hs.661664
1	0.98	0.726755	13.476	2 4	0.586288	-4.45767	8.27788e-05	-0.087	1.063	-0.098	1.275	NA	NA	0.682534	10.604	2 4	0.558252	0.382954	0.881835	-0.087	0.384	-0.126	0.629	NA	NA	0.63332	9.183	2 4	0.560274	0.867341	0.617725	-0.008	0.044	0.027	0.181	1	0.94	19.421	-3.36377	0.000768865	rs928944	100303919_TGI_at	ENST00000390400	ENSEMBL	human	Sim:Z23040, H.sapiens T-cell antigen receptor beta chain, partial CDS. (e=0.0,score=680,100% ID over 343nt [query=344nt], plus strand, blastn,Homo sapiens)
NA	NA	NA	NA	3 2	0.795506	-3.85492	0.00884162	-0.015	0.114	-0.007	0.047	NA	NA	NA	NA	3 2	0.87015	-5.76618	0.123626	-0.224	1.466	-0.274	2.039	NA	NA	NA	NA	3 2	0.858884	-5.22776	0.0367532	-0.056	0.435	-0.047	0.352	1	0.8	4.39	-3.34693	0.000817105	rs1042712	100312045_TGI_at	AK026971	GENBANK	human		Q92575	UBXD2	Hs.591242
1	0.98	0.934452	16.389	1 2	0.61468	-4.21632	0.00086607	-0.007	0.05	0	0.003	NA	NA	0.875451	13.807	1 2	0.567961	1.82452	0.495952	0.053	0.207	0.047	0.181	NA	NA	1.06876	20.066	1 2	0.608238	-1.12811	0.531158	-0.076	0.651	-0.047	0.347	NA	NA	29.345	-3.07325	0.00211742	rs1028245	100304794_TGI_at	DB153264	DBEST	human	Sim:AK223284, Homo sapiens mRNA for mutS homolog 2 variant, clone: SYN05289. (e=3e-16,score=89.7,93% ID over 57nt [query=583nt], plus strand, blastn,Homo sapiens)
NA	NA	NA	NA	NA	NA	NA	NA	0.041	0.371	0.037	0.334	NA	NA	NA	NA	3 1	0.914756	10.4881	0.0873886	0.039	0.148	0.044	0.169	NA	NA	NA	NA	3 1	0.93799	11.1092	0.00201079	0.11	1.129	0.091	0.844	1	0.88	4.242	3.47455	0.000511718	rs12746973	100302368_TGI_at	NM_013384	REFSEQ	human	Sim:AK001105, Homo sapiens cDNA FLJ10243 fis, clone HEMBB1000631, weakly similar to LONGEVITY-ASSURANCE PROTEIN 1. (e=0.0,score=4123,100% ID over 2080nt [query=2178nt], plus strand, blastn,Homo sapiens)	Q96G23	LASS2	Hs.713103
NA	NA	-0.355709	-4.846	4 1	0.690286	-0.556435	0.674409	0.07	0.769	0.041	0.379	NA	NA	-0.380601	-4.573	4 1	0.73301	0.529809	0.862662	-0.041	0.153	-0.016	0.055	1	0.8	-0.369602	-4.495	4 1	0.671079	6.23862	0.000894492	-0.061	0.493	-0.032	0.22	NA	NA	-8.008	1.14605	0.251774	rs7979527	100303765_TGI_at	M21119	GENBANK	human	Human lysozyme mRNA, complete cds.	P61626	LYZ	Hs.706744
NA	NA	0.344551	4.725	4 2	0.655671	-1.18396	0.362234	0.047	0.443	0.058	0.597	NA	NA	NA	NA	4 2	0.762042	0.477645	0.873839	-0.072	0.303	-0.068	0.28	1	0.8	0.524431	6.268	4 2	0.723284	-7.54429	0.000179371	0.169	2.223	0.102	0.996	NA	NA	7.767	-2.25336	0.0242364	rs937023	100304385_TGI_at	DT217384	DBEST	human		O43310	KIAA0427	Hs.145230
1	0.95	0.774745	5.303	1 3	0.94087	8.76573	0.000701678	-0.083	0.986	-0.11	1.52	NA	NA	NA	NA	NA	NA	NA	NA	-0.094	0.422	-0.065	0.265	NA	NA	NA	NA	1 3	0.941085	-3.85052	0.3153	-0.01	0.061	0.019	0.118	NA	NA	6.741	2.67885	0.00738755	rs17415601	100311606_TGI_at	AK125274	GENBANK	human	Homo sapiens cDNA FLJ43284 fis, clone LYMPB2000083, highly similar to HLA CLASS I HISTOCOMPATIBILITY ANTIGEN, ALPHA CHAIN F PRECURSOR.	P30511	HLA-F	Hs.519972
NA	NA	0.67256	9.941	2 3	0.375887	-4.65061	0.000360428	-0.041	0.38	-0.045	0.419	NA	NA	0.411931	5.687	2 3	0.351167	-3.06737	0.22835	0.021	0.075	0.035	0.129	NA	NA	0.413367	5.245	2 3	0.389041	0.767664	0.70207	-0.142	1.665	-0.108	1.098	1	0.97	12.363	-3.34143	0.000833466	rs6542518	100300268_TGI_at	XM_059423	REFSEQ	human	Sim:BC047365, Homo sapiens hypothetical protein LOC130355, mRNA (cDNA clone MGC:35431 IMAGE:5189916), complete cds. (e=0.0,score=2212,99% ID over 1144nt [query=1149nt], plus strand, blastn,Homo sapiens)	Q3KRA6	LOC130355	Hs.99488
NA	NA	NA	NA	3 1	0.864395	-2.63231	0.154333	0.084	1.006	0.092	1.148	NA	NA	NA	NA	3 1	0.854403	-6.57946	0.078155	0.193	1.163	0.182	1.064	1	0.98	0.474612	4.408	3 1	0.852129	9.06062	0.000611863	0.054	0.412	0.087	0.792	NA	NA	5.209	-0.128791	0.897523	rs1980530	100306033_TGI_at	BX647968	GENBANK	human	Homo sapiens mRNA; cDNA DKFZp686E1552 (from clone DKFZp686E1552).	Q9UJA9	ENPP5	Hs.35198
NA	NA	NA	NA	2 1	0.825974	3.83567	0.0214181	0.029	0.248	0.053	0.528	NA	NA	NA	NA	2 1	0.846676	5.24926	0.147632	0.017	0.06	0.008	0.026	NA	NA	NA	NA	2 1	0.840022	7.32492	0.00319302	-0.012	0.073	0.019	0.117	1	0.9	4.076	3.53054	0.000414705	rs3751753	100300837_TGI_at	NM_198491	REFSEQ	human	Homo sapiens family with sequence similarity 92, member B (FAM92B),		FAM92B	Hs.125713
NA	NA	0.634139	5.057	3 4	0.906507	6.56348	0.00361101	0.064	0.676	0.049	0.477	NA	NA	NA	NA	3 4	0.911394	1.12793	0.785382	-0.115	0.554	-0.074	0.313	NA	NA	0.657678	4.879	3 4	0.912418	5.64909	0.0439177	0.099	0.954	0.073	0.62	1	0.81	7.419	3.50007	0.000465144	rs769178	100305324_TGI_at	CN480851	DBEST	human
NA	NA	-0.340345	-4.717	3 1	0.278518	1.53086	0.249383	0.014	0.107	0.006	0.043	NA	NA	-0.447918	-5.848	3 1	0.275443	0.820695	0.768936	0.084	0.363	0.11	0.522	1	0.89	-0.466428	-6.062	3 1	0.282159	-6.62337	0.00057863	-0.061	0.489	-0.015	0.091	NA	NA	-9.522	-0.407134	0.68391	rs3761916	100300216_TGI_at	XM_209271	REFSEQ	human	Sim:AK096315, Homo sapiens cDNA FLJ38996 fis, clone NT2RI2020390. (e=0.0,score=4444,100% ID over 2242nt [query=2242nt], plus strand, blastn,Homo sapiens)	Q9HDB9
NA	NA	NA	NA	3 1	0.626628	4.25144	0.000920302	0.003	0.02	0.025	0.204	NA	NA	NA	NA	3 1	0.612663	5.11735	0.0438973	-0.108	0.507	-0.122	0.597	NA	NA	NA	NA	3 1	0.60669	0.767842	0.677785	-0.063	0.513	0.008	0.046	1	0.94	-5.212	3.54237	0.000396543	rs4035021	100301292_TGI_at	NM_139163	REFSEQ	human	Homo sapiens amyotrophic lateral sclerosis 2 (juvenile) chromosome		ALS2CR12	Hs.107944
NA	NA	-0.339475	-4.7	3 1	0.687948	2.58001	0.04276	-0.046	0.44	-0.051	0.498	NA	NA	NA	NA	3 1	0.726947	5.77056	0.0410355	0.014	0.048	0.052	0.203	NA	NA	NA	NA	3 1	0.739712	5.3168	0.00494031	-0.068	0.569	-0.076	0.655	1	0.84	-6.493	3.33701	0.000846834	rs13008221	100306724_TGI_at	BU687885	DBEST	human
NA	NA	NA	NA	2 4	0.202093	1.12115	0.474787	-0.04	0.364	-0.029	0.242	NA	NA	NA	NA	2 4	0.170687	0.314649	0.92357	-0.01	0.035	-0.006	0.021	1	0.92	0.458559	4.424	2 4	0.162259	-8.29656	0.000901488	-0.106	1.061	-0.091	0.853	NA	NA	4.456	-0.545878	0.58515	rs1466131	100313116_TGI_at	AF201290	GENBANK	human		O75157	KIAA0669	Hs.644065; Hs.665220
NA	NA	-0.306523	-4.531	1 3	0.533097	0.685324	0.569529	-0.005	0.038	0.002	0.016	NA	NA	NA	NA	1 3	0.526692	4.50014	0.0702348	-0.006	0.019	-0.018	0.064	1	0.98	-0.371058	-4.87	1 3	0.502733	5.9405	0.000754885	-0.185	2.585	-0.16	2.03	NA	NA	-6.925	2.3025	0.021307	rs9859129	100301782_TGI_at	NM_022443	REFSEQ	human	Homo sapiens myeloid leukemia factor 1 (MLF1), mRNA.	P58340	MLF1	Hs.85195
1	0.86	NA	NA	1 3	0.689811	3.91251	0.00284547	-0.009	0.065	-0.004	0.025	NA	NA	-0.366973	-4.828	1 3	0.673137	4.50485	0.0710234	-0.024	0.084	-0.034	0.127	NA	NA	NA	NA	1 3	0.685118	1.4076	0.444801	0.034	0.234	0.025	0.161	1	0.91	-5.911	3.35454	0.000794965	rs10064824	100302011_TGI_at	NM_018268	REFSEQ	human	Homo sapiens WD repeat domain 41 (WDR41), mRNA.	Q9HAD4	WDR41	Hs.482573
NA	NA	NA	NA	4 2	0.410216	-4.02213	0.00128432	0.066	0.715	0.07	0.778	NA	NA	NA	NA	4 2	0.441408	0.630006	0.7944	-0.009	0.029	-0.023	0.08	NA	NA	NA	NA	4 2	0.450688	-3.13988	0.0789224	-0.025	0.161	-0.005	0.029	1	0.82	-4.716	-3.50417	0.000458026	rs1035858	100304836_TGI_at	DA885371	DBEST	human		Q9HCS5	EPB41L4A	Hs.584954
NA	NA	NA	NA	1 2	0.326216	-3.69174	0.00313118	0.103	1.368	0.107	1.446	NA	NA	NA	NA	1 2	0.314078	-1.81142	0.507985	-0.055	0.219	-0.013	0.045	NA	NA	0.428724	5.21	1 2	0.292259	-4.38074	0.0284205	0.014	0.082	-0.004	0.025	1	0.97	5.83	-3.61052	0.000305587	rs2836907	100311337_TGI_at	AL109785	GENBANK	human		Q9NSI6	BRWD1	Hs.654740
1	0.98	0.850664	5.826	1 3	0.94087	8.76573	0.000701678	0.012	0.093	-0.005	0.039	NA	NA	NA	NA	NA	NA	NA	NA	0.079	0.339	0.096	0.437	NA	NA	NA	NA	1 3	0.941085	-3.85052	0.3153	-0.037	0.263	-0.013	0.079	NA	NA	5.877	2.67885	0.00738755	rs17415601	100303756_TGI_at	M27539	GENBANK	human	Human MHC class I HLA-A cell surface antigen mRNA, (HLA-A28,-B40, -Cw3), clone LB45.	P10314	HLA-A	Hs.181244; Hs.713441
NA	NA	-0.531105	-5.803	2 4	0.834515	0.223167	0.896207	0.085	1.025	0.104	1.388	NA	NA	NA	NA	2 4	0.824029	5.21049	0.111358	0.18	1.047	0.207	1.297	1	0.89	-0.534957	-5.577	2 4	0.814596	-7.27984	0.000953953	-0.082	0.728	-0.052	0.4	NA	NA	-8.34	-1.21724	0.223514	rs11191659	100311002_TGI_at	AL832477	GENBANK	human	Homo sapiens mRNA; cDNA DKFZp686B2219 (from clone DKFZp686B2219).		C10orf32	Hs.34492
NA	NA	NA	NA	3 4	0.906507	6.56348	0.00361101	0.028	0.234	0.045	0.42	NA	NA	NA	NA	3 4	0.911394	1.12793	0.785382	-0.113	0.537	-0.122	0.6	NA	NA	NA	NA	3 4	0.912418	5.64909	0.0439177	0.052	0.391	0.068	0.563	1	0.87	4.385	3.50007	0.000465144	rs769178	100305045_TGI_at	D83543	GENBANK	human	Homo sapiens mRNA expressed in skin fibroblast.
[truncated: 1 more columns]

## Sheet: FEV1-FVC
Laval.Call	Laval.Confidence	Laval.eQTL.beta	Laval.eQTL.Zscore	Laval.effective.allele.and.reference.allele	A2F	Laval.GWAS.beta	Laval.GWAS.pvalue	Laval.Pearson.rho	Laval.Pearson.negative.log10.pvalue	Laval.Spearman.rho	Laval.Spearman.negative.log10.pvalue	Groningen.Call	Groningen.Confidence	Groningen.eQTL.beta	Groningen.eQTL.Zscore	Groningen.effective.allele.and.reference.allele	A2F	Groningen.GWAS.beta	Groningen.GWAS.pvalue	Groningen.Pearson.rho	Groningen.Pearson.negative.log10.pvalue	Groningen.Spearman.rho	Groningen.Spearman.negative.log10.pvalue	UBC.Call	UBC.Confidence	UBC.eQTL.beta	UBC.eQTL.Zscore	UBC.effective.allele.and.reference.allele	A2F	UBC.GWAS.beta	UBC.GWAS.pvalue	UBC.Pearson.rho	UBC.Pearson.negative.log10.pvalue	UBC.Spearman.rho	UBC.Spearman.negative.log10.pvalue	meta.Call	meta.Confidence	meta.eQTL.Zscore	meta.GWAS.Z	meta.GWAS.pvalue	rsID	Input	Transcript	Transcript Type	Species	Transcript/Description	Gene/SwissProt/Id	Gene/Proteome/Id	Gene/Unigene
NA	NA	NA	NA	2 1	0.628842	0.0199741	0.00142865	-0.022	0.176	-0.048	0.449	NA	NA	NA	NA	2 1	0.618944	-0.00565524	0.785267	0.022	0.081	0.05	0.206	NA	NA	NA	NA	2 1	0.644327	0.0111127	0.217057	-0.09	0.837	-0.105	1.047	1	0.88	4.32	3.3758	0.00073601	rs7100300	100152110_TGI_at	NM_080722	REFSEQ	human	Homo sapiens ADAM metallopeptidase with thrombospondin type 1	Q8WXS8	ADAMTS14	Hs.352156
NA	NA	-0.387079	-4.652	3 1	0.197799	-0.022159	0.00322243	-0.001	0.009	0.023	0.183	NA	NA	NA	NA	3 1	0.184246	-0.0140482	0.57684	0.092	0.443	0.196	1.302	NA	NA	NA	NA	3 1	0.187753	-0.0166137	0.0984961	0.073	0.617	0.056	0.437	1	0.855	-5.42	-3.41035	0.000648799	rs10849479	100122656_TGI_at	NM_018009	REFSEQ	human	Homo sapiens TAP binding protein-like (TAPBPL), mRNA.	Q9BX59	Tapbpl	Hs.504597
NA	NA	NA	NA	4 2	0.370573	0.0174216	0.00544087	-0.007	0.048	-0.043	0.385	NA	NA	NA	NA	4 2	0.331324	0.0249709	0.212579	0.162	0.972	0.108	0.549	NA	NA	0.357178	4.702	4 2	0.380919	0.0157064	0.0532387	0.138	1.589	0.155	1.923	1	0.925	4.866	3.46942	0.000521586	rs2474028	100156096_TGI_at	ENST00000322514	ENSEMBL	human	Sim:BX098778, Transcribed locus (e=1e-120,score=434,100% ID over 219nt [query=1535nt], plus strand, blastn)
NA	NA	-0.558451	-8.267	2 4	0.674941	0.0021908	0.738811	-0.035	0.305	-0.034	0.292	NA	NA	-0.444106	-6.029	2 4	0.700243	-0.0118101	0.586405	0.086	0.404	0.126	0.676	1	0.95	-0.487037	-6.301	2 4	0.668536	0.0291869	0.000582549	-0.042	0.306	-0.029	0.191	NA	NA	-11.992	2.03696	0.0416541	rs2976399	100147656_TGI_at	AK127631	GENBANK	human		O75564	JRK	Hs.535903; Hs.683465
NA	NA	NA	NA	1 2	0.619125	0.0252644	3.71211e-05	-0.014	0.105	-0.007	0.048	NA	NA	NA	NA	1 2	0.564275	-0.0118621	0.508369	0.008	0.028	0.032	0.123	NA	NA	NA	NA	1 2	0.596682	-0.00387147	0.654412	0.143	1.68	0.105	1.053	1	0.805	-4.283	3.41927	0.000627891	rs1470539	100154946_TGI_at	NM_018059	REFSEQ	human	Homo sapiens Rap GTPase interactor (RADIL), mRNA.	Q96JH8	RADIL	Hs.667336
NA	NA	-0.369124	-4.31	3 2	0.746798	-0.00936926	0.226016	0.041	0.37	0.039	0.344	NA	NA	-0.370404	-4.582	3 2	0.694958	0.00534867	0.799222	-0.151	0.884	-0.173	1.076	1	0.84	-0.436039	-4.925	3 2	0.695155	0.0318504	0.00076137	-0.015	0.092	-0.046	0.336	NA	NA	-7.942	0.924624	0.355162	rs389008	100154528_TGI_at	AF147424	GENBANK	human	Homo sapiens full length insert cDNA clone YP77A07.
NA	NA	NA	NA	2 4	0.816298	-0.019488	0.00929208	-0.026	0.207	-0.029	0.238	NA	NA	NA	NA	2 4	0.838654	0.024488	0.324204	0.005	0.018	0.043	0.174	NA	NA	NA	NA	2 4	0.825385	-0.0274984	0.0122716	0.147	1.76	0.122	1.312	1	0.955	4.268	-3.32508	0.000883922	rs12823181	100129937_TGI_at	CA411950	DBEST	human	Sim:AI554090, Transcribed locus (e=2e-05,score=52.0,100% ID over 26nt [query=740nt], plus strand, blastn)
NA	NA	NA	NA	NA	NA	NA	NA	0.043	0.386	-0.003	0.02	NA	NA	NA	NA	1 3	0.938107	-0.0309907	0.399632	0.074	0.334	0.135	0.747	NA	NA	NA	NA	1 3	0.945208	0.055746	0.000443183	0.014	0.083	0.013	0.078	1	0.86	5.272	3.30547	0.000948172	rs10280406	100125078_TGI_at	BC015339	GENBANK	human	Homo sapiens mRNA similar to phosphoserine phosphatase-like (cDNA clone IMAGE:4448890).		PSPHL
NA	NA	0.536649	8.391	2 4	0.620493	0.00229388	0.707031	-0.01	0.075	-0.01	0.068	NA	NA	0.379891	5.513	2 4	0.542987	-0.0120929	0.521542	-0.028	0.109	0.068	0.3	1	0.975	0.511147	7.385	2 4	0.590144	0.0255561	0.000770447	0.035	0.245	0.038	0.264	NA	NA	12.37	2.10371	0.0354035	rs4141288	100150661_TGI_at	CA431184	DBEST	human	Sim:BQ027325, Transcribed locus (e=3e-04,score=48.1,100% ID over 24nt [query=723nt], plus strand, blastn)
NA	NA	NA	NA	1 3	0.873537	0.00523952	0.558542	0.012	0.088	0.019	0.144	1	0.9	-0.410048	-5.647	1 3	0.76188	0.0898653	2.16068e-05	-0.053	0.222	-0.093	0.449	NA	NA	NA	NA	1 3	0.852058	0.00159174	0.889916	-0.011	0.065	-0.037	0.259	NA	NA	-4.459	1.24711	0.212359	rs8010121	100146193_TGI_at	AB007969	GENBANK	human	Homo sapiens mRNA, chromosome 1 specific transcript KIAA0500.
NA	NA	NA	NA	1 3	0.232777	-0.0241426	0.000429773	-0.033	0.277	-0.027	0.218	NA	NA	NA	NA	1 3	0.212032	0.00516664	0.822681	-0.034	0.135	-0.038	0.152	NA	NA	NA	NA	1 3	0.220871	-0.0149371	0.118077	0.008	0.046	-0.015	0.095	1	0.9	-8.043	-3.81798	0.000134551	rs2286721	100133992_TGI_at	BE150563	DBEST	human	Sim:M36164, Human glyceraldehyde-3-phosphate dehydrogenase mRNA, 3' flank. (e=9e-60,score=232,93% ID over 147nt [query=178nt], plus strand, blastn,Homo sapiens)
NA	NA	NA	NA	1 4	0.552021	-0.00959812	0.155737	-0.025	0.203	-0.036	0.311	NA	NA	NA	NA	1 4	0.517716	0.00796721	0.667833	0.075	0.339	0.036	0.144	1	0.855	0.345953	4.472	1 4	0.530934	0.0276175	0.000835722	0.09	0.829	0.109	1.102	NA	NA	4.118	0.755305	0.450066	rs3754186	100146916_TGI_at	BX648062	GENBANK	human	Homo sapiens mRNA; cDNA DKFZp686I05203 (from clone DKFZp686I05203).
NA	NA	NA	NA	4 2	0.370573	0.0174216	0.00544087	-0.016	0.124	-0.017	0.125	NA	NA	NA	NA	4 2	0.331324	0.0249709	0.212579	-0.061	0.265	-0.025	0.095	NA	NA	NA	NA	4 2	0.380919	0.0157064	0.0532387	0.091	0.845	0.066	0.546	1	0.87	4.076	3.46942	0.000521586	rs2474028	100160661_TGI_at	NM_004239	REFSEQ	human	Homo sapiens thyroid hormone receptor interactor 11 (TRIP11), mRNA.	Q15643	TRIP11	Hs.632339
NA	NA	-0.934745	-11.6	4 3	0.819176	0.0273266	0.000884883	-0.199	3.948	-0.203	4.086	NA	NA	-0.542931	-6.493	4 3	0.800925	-0.000935987	0.963765	0.042	0.172	0.086	0.408	NA	NA	-0.387577	-4.256	4 3	0.791775	0.0138273	0.147985	-0.017	0.106	-0.018	0.11	1	0.845	-13.323	3.50328	0.000459565	rs10411704	100154732_TGI_at	NM_001771	REFSEQ	human	Homo sapiens CD22 molecule (CD22), mRNA.	P20273	CD22	Hs.709215
NA	NA	NA	NA	2 4	0.86993	0.00657604	0.488337	0.068	0.719	0.029	0.236	1	0.8	-0.314698	-4.332	2 4	0.766453	0.0882551	5.05235e-05	-0.124	0.664	-0.168	1.027	NA	NA	NA	NA	2 4	0.853577	-0.000385999	0.974827	-0.144	1.701	-0.132	1.494	NA	NA	NA	1.25608	0.209089	rs3748312	100150412_TGI_at	AW297465	DBEST	human	Transcribed locus	Q9P2D8	KIAA1409	Hs.126561
NA	NA	0.63606	5.299	4 2	0.914887	-0.0333435	0.00272908	-0.06	0.61	-0.03	0.246	NA	NA	NA	NA	4 2	0.922328	0.00860654	0.820202	0.109	0.556	0.082	0.38	NA	NA	NA	NA	4 2	0.926025	-0.0215718	0.134609	-0.016	0.097	0.014	0.088	1	0.9	6.663	-3.31526	0.00091557	rs2287765	100147290_TGI_at	NM_001001325	REFSEQ	human	Homo sapiens Kazal type serine protease inhibitor 5-like 2		SPINK5L2	Hs.553815
NA	NA	-0.427193	-5.119	3 1	0.197799	-0.022159	0.00322243	-0.012	0.089	-0.014	0.101	NA	NA	NA	NA	3 1	0.184246	-0.0140482	0.57684	0.066	0.293	0.126	0.683	NA	NA	NA	NA	3 1	0.187753	-0.0166137	0.0984961	0.086	0.783	0.064	0.518	1	0.87	-4.924	-3.41035	0.000648799	rs10849479	100148294_TGI_at	NM_014865	REFSEQ	human	Homo sapiens non-SMC condensin I complex, subunit D2 (NCAPD2),	Q15021	NCAPD2	Hs.5719; Hs.544577
NA	NA	NA	NA	NA	NA	NA	NA	-0.109	1.445	-0.12	1.688	NA	NA	NA	NA	3 1	0.936893	0.0082877	0.857736	-0.201	1.359	-0.136	0.754	NA	NA	0.697089	4.565	3 1	0.939726	0.0529924	0.000741724	0.059	0.469	0.074	0.633	1	0.965	5.063	3.37249	0.000744909	rs7163545	100152605_TGI_at	BF927083	DBEST	human	Sim:DA654470, Transcribed locus (e=3e-47,score=190,100% ID over 96nt [query=495nt], plus strand, blastn)
NA	NA	0.584116	7.027	4 3	0.793144	-0.00176598	0.822739	-0.077	0.856	-0.058	0.582	1	0.87	0.403774	4.436	4 3	0.792472	0.0840556	0.000441118	0.038	0.149	0.073	0.331	NA	NA	0.589988	6.717	4 3	0.79726	-0.0174147	0.0722882	0.043	0.307	0.026	0.17	NA	NA	10.594	-0.848446	0.39619	rs6815746	100150031_TGI_at	NM_015274	REFSEQ	human	Homo sapiens mannosidase, alpha, class 2B, member 2 (MAN2B2), mRNA.	Q9Y2E5	MAN2B2	Hs.188464
NA	NA	NA	NA	1 3	0.70331	-0.0214954	0.0013527	0.008	0.059	0.007	0.052	NA	NA	NA	NA	1 3	0.723301	-0.0193856	0.357249	-0.075	0.338	-0.109	0.556	NA	NA	NA	NA	1 3	0.691796	-0.0121342	0.149434	0.028	0.189	0.012	0.074	1	0.87	4.871	-3.5454	0.000392019	rs2691171	100149365_TGI_at	AJ420571	GENBANK	human	Homo sapiens mRNA full length insert cDNA clone EUROIMAGE 1628928.	Q9BWU1	CDC2L6	Hs.584867
NA	NA	NA	NA	1 4	0.404383	0.00112704	0.859958	0.063	0.651	0.076	0.837	NA	NA	NA	NA	1 4	0.356597	-0.0184975	0.301221	0.032	0.124	0.06	0.261	1	0.865	-0.368141	-5.06	1 4	0.39101	-0.026445	0.000755432	0.183	2.54	0.165	2.13	NA	NA	-5.367	-1.84467	0.0650857	rs1962386	100146525_TGI_at	XM_945005	REFSEQ	human	PREDICTED: Homo sapiens hypothetical LOC285047 (LOC285047), mRNA.
NA	NA	0.829606	12.607	4 1	0.293548	-0.0155033	0.0188529	-0.129	1.884	-0.108	1.422	NA	NA	0.39658	5.017	4 1	0.279424	-0.0198857	0.369857	-0.078	0.359	-0.102	0.505	1	0.82	0.73376	9.451	4 1	0.314214	-0.0313377	0.000354355	-0.173	2.295	-0.172	2.273	NA	NA	16.188	-3.87756	0.000105508	rs9987135	100154484_TGI_at	NM_022783	REFSEQ	human	Homo sapiens DEP domain containing 6 (DEPDC6), mRNA.	Q8TB45	DEPDC6	Hs.112981
NA	NA	-0.431955	-5.752	1 3	0.75561	0.0076229	0.273939	-0.064	0.661	-0.057	0.567	NA	NA	NA	NA	1 3	0.775739	0.000811029	0.969909	-0.084	0.395	-0.062	0.267	1	0.965	-0.436706	-5.024	1 3	0.751807	0.0316725	0.00056649	-0.016	0.102	-0.059	0.464	NA	NA	-8.145	2.68467	0.0072602	rs9941290	100146660_TGI_at	NM_206999	REFSEQ	human	Homo sapiens CCR4-NOT transcription complex, subunit 1 (CNOT1),	A5YKK6	CNOT1	Hs.460923; Hs.655689
NA	NA	NA	NA	2 1	0.90027	-0.0337643	0.00193056	-0.014	0.107	-0.026	0.209	NA	NA	NA	NA	2 1	0.891853	-0.00878043	0.767772	0.105	0.526	0.12	0.633	NA	NA	NA	NA	2 1	0.907747	-0.0173029	0.212787	0.089	0.817	0.092	0.864	1	0.885	4.442	-3.30841	0.000938261	rs39739	100157555_TGI_at	AK096056	GENBANK	human	Homo sapiens cDNA FLJ38737 fis, clone KIDNE2011200.			Hs.561708
NA	NA	NA	NA	3 1	0.857953	0.029241	0.00128895	-0.066	0.694	-0.042	0.378	NA	NA	NA	NA	3 1	0.848513	-0.00415163	0.87852	-0.058	0.246	0.041	0.163	NA	NA	NA	NA	3 1	0.868116	0.0146027	0.21309	-0.057	0.451	-0.01	0.062	1	0.885	-4.828	3.37307	0.000743355	rs4714509	100154920_TGI_at	NM_002630	REFSEQ	human	Homo sapiens progastricsin (pepsinogen C) (PGC), mRNA.	P20142	PGC	Hs.1867
NA	NA	NA	NA	NA	NA	NA	NA	0.068	0.724	0.086	1.005	NA	NA	NA	NA	NA	NA	NA	NA	-0.021	0.08	-0.069	0.309	NA	NA	NA	NA	2 3	0.948115	0.0628592	0.000190369	0.003	0.016	-0.043	0.313	1	0.94	-5.108	3.73147	0.000190369	rs979684	100132247_TGI_at	N22766	DBEST	human	Sim:BM678934, Transcribed locus (e=0.0,score=1053,97% ID over 583nt [query=640nt], plus strand, blastn)
NA	NA	NA	NA	3 2	0.711501	-0.00144034	0.832304	-0.005	0.034	0.018	0.134	1	0.915	-0.314499	-4.29	3 2	0.709949	-0.0636461	0.000453963	-0.018	0.067	-0.081	0.377	NA	NA	NA	NA	3 2	0.674082	0.0100686	0.249018	0.089	0.816	0.068	0.567	NA	NA	-5.418	-0.0202547	0.98384	rs1230468	100126244_TGI_at	ENST00000378805	ENSEMBL	human	Sim:XM_001716651, PREDICTED: Homo sapiens similar to Leucine-rich repeat protein SHOC-2 (Ras-binding protein Sur-8) (LOC220416), mRNA. (e=0.0,score=3683,100% ID over 1858nt [query=1858nt], plus strand, blastn,Homo sapiens)	Q05C16	RP11-139H14.4	Hs.267765
1	0.815	0.637629	9.406	2 4	0.380965	-0.0222654	0.000645556	-0.033	0.274	-0.045	0.409	NA	NA	0.417573	5.787	2 4	0.36755	-0.0193833	0.299904	-0.084	0.397	-0.129	0.702	NA	NA	0.371571	4.776	2 4	0.403958	0.0132469	0.145131	-0.147	1.763	-0.08	0.701	NA	NA	11.82	-2.47456	0.0133402	rs11686984	100154256_TGI_at	ENST00000334816	ENSEMBL	human		Q3KRA6	LOC130355	Hs.99488
NA	NA	NA	NA	1 3	0.232777	-0.0241426	0.000429773	-0.037	0.326	-0.036	0.312	NA	NA	NA	NA	1 3	0.212032	0.00516664	0.822681	-0.151	0.88	-0.115	0.595	NA	NA	NA	NA	1 3	0.220871	-0.0149371	0.118077	-0.126	1.386	-0.106	1.06	1	0.855	4.284	-3.81798	0.000134551	rs2286721	100155076_TGI_at	NM_016497	REFSEQ	human	Homo sapiens mitochondrial ribosomal protein L51 (MRPL51), nuclear	Q4U2R6	mRpL51	Hs.55847
NA	NA	0.408523	4.208	3 1	0.854104	-0.00352248	0.692298	0.003	0.022	-0.005	0.031	NA	NA	0.442171	4.535	3 1	0.860385	0.0437694	0.0841223	0.031	0.122	0.114	0.59	1	0.805	0.570646	5.672	3 1	0.848466	0.0370066	0.000942709	-0.022	0.142	0.053	0.41	NA	NA	8.284	1.63761	0.101502	rs6461717	100143309_TGI_at	BC069011	GENBANK	human	Homo sapiens cDNA clone IMAGE:5924874, partial cds.	Q13595	TRA2A	Hs.445652
1	0.83	0.835376	7.984	2 4	0.888156	-0.0335739	0.000543423	-0.064	0.661	-0.06	0.605	NA	NA	NA	NA	2 4	0.909141	0.0321296	0.299083	-0.072	0.323	-0.108	0.547	NA	NA	0.827918	6.749	2 4	0.894856	0.0266775	0.0587417	0.03	0.2	0.014	0.087	NA	NA	11.196	-2.22699	0.0259476	rs4859003	100149097_TGI_at	AK001859	GENBANK	human		Q8IZM8	ZNF654	Hs.591650; Hs.661116
NA	NA	-0.511924	-6.583	2 4	0.752946	0.0146879	0.0473988	-0.064	0.665	-0.051	0.49	NA	NA	NA	NA	2 4	0.709968	-0.00727506	0.726987	-0.076	0.349	-0.032	0.124	1	0.935	-0.382412	-4.669	2 4	0.721923	-0.0287759	0.000856703	-0.107	1.073	-0.108	1.094	NA	NA	-8.357	-0.44831	0.653929	rs559062	100138509_TGI_at	NM_001036646	REFSEQ	human	Homo sapiens HERV-H LTR-associating 3 (HHLA3), transcript variant	Q9XRX5	HHLA3	Hs.142245
NA	NA	NA	NA	2 1	0.259319	0.0155998	0.0241284	0.132	1.978	0.123	1.76	NA	NA	NA	NA	2 1	0.231603	-0.0367018	0.0903524	-0.047	0.192	-0.077	0.355	NA	NA	NA	NA	2 1	0.25709	0.0348695	0.000193193	-0.078	0.677	-0.029	0.191	1	0.965	4.761	3.62275	0.000291487	rs13146564	100162421_TGI_at	NM_001042784	REFSEQ	human	Homo sapiens hypothetical protein FLJ25770 (FLJ25770), mRNA.		FLJ25770	Hs.529680
NA	NA	NA	NA	1 4	0.552021	-0.00959812	0.155737	0.051	0.482	0.074	0.805	NA	NA	NA	NA	1 4	0.517716	0.00796721	0.667833	0.13	0.707	0.023	0.085	1	0.82	0.332543	4.284	1 4	0.530934	0.0276175	0.000835722	0.026	0.171	0.06	0.476	NA	NA	4.812	0.755305	0.450066	rs3754186	100140956_TGI_at	NM_016040	REFSEQ	human	Homo sapiens transmembrane emp24 protein transport domain	Q9Y3A6	Tmed5	Hs.482873
NA	NA	NA	NA	1 4	0.316297	0.0175763	0.00745333	-0.055	0.54	-0.036	0.31	NA	NA	NA	NA	1 4	0.321994	0.019255	0.315618	0.249	1.925	0.186	1.206	NA	NA	NA	NA	1 4	0.295907	0.0184404	0.0508769	-0.112	1.16	-0.076	0.654	1	0.825	4.11	3.34591	0.000820119	rs17754977	100132911_TGI_at	NM_183239	REFSEQ	human	Homo sapiens glutathione S-transferase omega 2 (GSTO2), mRNA.	Q9H4Y5	GSTO2	Hs.203634
NA	NA	-0.757498	-9.088	3 1	0.824078	-0.000410955	0.960131	0.035	0.305	0.034	0.287	1	0.85	-0.812013	-9.702	3 1	0.8181	0.0812626	0.000994459	0.022	0.083	-0.06	0.259	NA	NA	-0.878653	-9.015	3 1	0.852244	-0.0120431	0.301252	-0.047	0.351	-0.025	0.16	NA	NA	-15.944	-0.166605	0.867681	rs2416864	100135128_TGI_at	DB308606	DBEST	human	Sim:BI830485, Transcribed locus (e=1e-106,score=387,98% ID over 208nt [query=565nt], plus strand, blastn)	Q15612	OR1Q1	Hs.684864
NA	NA	NA	NA	4 1	0.681488	-0.00048684	0.942289	0.013	0.099	0.01	0.075	1	0.91	-0.353517	-4.753	4 1	0.679814	0.0673127	0.000915744	0.034	0.134	0.003	0.01	NA	NA	NA	NA	4 1	0.639574	-0.00697114	0.424199	-0.11	1.115	-0.097	0.931	NA	NA	-7.001	-0.145894	0.884005	rs3744281	100159725_TGI_at	BQ773020	DBEST	human
NA	NA	0.654608	7.159	2 4	0.860781	0.00560203	0.519924	-0.062	0.628	-0.093	1.143	NA	NA	0.661813	6.757	2 4	0.866505	-0.00853083	0.727575	0.025	0.096	0.085	0.398	1	0.865	0.540127	4.904	2 4	0.860122	0.0401662	0.000384691	-0.07	0.587	-0.059	0.465	NA	NA	10.989	2.34316	0.0191213	rs875767	100133715_TGI_at	NM_002225	REFSEQ	human	Homo sapiens isovaleryl Coenzyme A dehydrogenase (IVD), nuclear	P26440	IVD	Hs.449599; Hs.513646
NA	NA	NA	NA	NA	NA	NA	NA	-0.03	0.246	-0.048	0.451	NA	NA	-0.769661	-4.419	NA	NA	NA	NA	0.093	0.451	0.124	0.662	NA	NA	NA	NA	3 4	0.939726	0.0541809	0.000579471	-0.061	0.484	-0.018	0.111	1	0.945	-5.492	3.44105	0.000579471	rs7791644	100142794_TGI_at	BU932175	DBEST	human		Q8NI28		Hs.647014
NA	NA	0.350216	4.545	3 4	0.757665	0.00762293	0.27298	-0.028	0.228	-0.008	0.055	NA	NA	NA	NA	3 4	0.770627	0.00375433	0.858293	0.011	0.04	0.051	0.212	1	0.955	0.39611	4.562	3 4	0.747938	0.0306793	0.000855297	0.016	0.098	0.101	0.988	NA	NA	7.161	2.63335	0.00845475	rs9923491	100155065_TGI_at	NM_024860	REFSEQ	human	Homo sapiens SET domain containing 6 (SETD6), mRNA.	Q8TBK2	SETD6	Hs.592060
NA	NA	NA	NA	1 3	0.138362	0.0259718	0.00647013	0.06	0.607	0.026	0.209	NA	NA	NA	NA	1 3	0.126035	-0.0210364	0.488379	-0.005	0.016	0.116	0.607	NA	NA	NA	NA	1 3	0.120621	0.0265902	0.0407642	0.136	1.556	0.139	1.616	1	0.89	4.986	3.29533	0.000983048	rs7187832	100146885_TGI_at	AK095480	GENBANK	human	Homo sapiens cDNA FLJ38161 fis, clone DFNES2002588.			Hs.569669
NA	NA	-1.28899	-19.427	4 3	0.819176	0.0273266	0.000884883	-0.119	1.673	-0.109	1.456	NA	NA	-0.948447	-12.757	4 3	0.800925	-0.000935987	0.963765	0.062	0.269	0.143	0.813	NA	NA	-0.945803	-12.2	4 3	0.791775	0.0138273	0.147985	-0.021	0.135	-0.072	0.615	1	0.92	-26.146	3.50328	0.000459565	rs10411704	100137460_TGI_at	NM_002361	REFSEQ	human	Homo sapiens myelin associated glycoprotein (MAG), transcript	P20916	MAG	Hs.643440
NA	NA	0.367323	5.251	1 3	0.485598	-0.00282963	0.658505	0.071	0.771	0.075	0.82	NA	NA	NA	NA	NA	NA	NA	NA	0.031	0.119	0.019	0.069	1	0.925	0.392066	5.528	1 3	0.499927	-0.0262838	0.000981297	0.033	0.222	0.004	0.024	NA	NA	7.619	-2.18364	0.0289887	rs9525300	100131828_TGI_at	NM_003903	REFSEQ	human	Homo sapiens cell division cycle 16 homolog (S. cerevisiae)	Q13042	CDC16	Hs.374127
NA	NA	NA	NA	1 4	0.229931	-0.00266338	0.710193	0.053	0.507	0.061	0.616	1	0.92	-0.393699	-4.583	1 4	0.245382	-0.10249	8.12459e-06	-0.171	1.056	-0.145	0.83	NA	NA	-0.509966	-5.81	1 4	0.24056	0.00473197	0.619112	-0.002	0.011	0.034	0.232	NA	NA	-8.088	-0.47993	0.631277	rs9483760	100133258_TGI_at	ENST00000367826	ENSEMBL	human	Sim:AJ420551, Homo sapiens mRNA full length insert cDNA clone EUROIMAGE 1657957. (e=0.0,score=4195,99% ID over 2126nt [query=2132nt], plus strand, blastn,Homo sapiens)	Q9Y450	HBS1L	Hs.378532
NA	NA	-0.491451	-6.312	3 1	0.223474	-0.00315101	0.657427	-0.012	0.091	-0.003	0.021	1	0.9	-0.483028	-5.778	3 1	0.240294	-0.101387	6.30501e-06	-0.054	0.23	-0.011	0.038	NA	NA	-0.553578	-6.625	3 1	0.234251	0.000772937	0.93363	0.069	0.579	0.076	0.661	NA	NA	-10.786	-0.755172	0.450146	rs2327576	100121621_TGI_at	NM_170771	REFSEQ	human	Homo sapiens aldehyde dehydrogenase 8 family, member A1 (ALDH8A1),	Q9H2A2	ALDH8A1	Hs.486520
1	0.81	0.804922	13.596	1 2	0.628842	0.0219907	0.000305029	-0.155	2.57	-0.147	2.359	NA	NA	0.492224	7.277	1 2	0.593448	-0.0307542	0.0925104	0.009	0.033	0.108	0.55	NA	NA	0.488239	6.696	1 2	0.589041	-0.0151586	0.0641753	-0.001	0.004	0.081	0.721	NA	NA	16.589	2.10503	0.0352888	rs9304593	100162425_TGI_at	NM_198540	REFSEQ	human	Homo sapiens UDP-GlcNAc:betaGal	Q7Z7M8	B3GNT8	Hs.441681
NA	NA	-0.536332	-7.548	2 4	0.31733	-0.00720496	0.289197	-0.02	0.159	-0.031	0.263	NA	NA	-0.391541	-5.066	2 4	0.294472	-0.0211391	0.296762	-0.058	0.249	-0.011	0.041	1	0.955	-0.627225	-8.518	2 4	0.346638	0.0278963	0.000952947	-0.189	2.677	-0.098	0.951	NA	NA	-12.3	0.839708	0.401072	rs1559885	100141428_TGI_at	NM_152765	REFSEQ	human	Homo sapiens chromosome 8 open reading frame 46 (C8orf46), mRNA.		C8orf46	Hs.709249
NA	NA	-0.556616	-6.146	3 1	0.824078	-0.000410955	0.960131	0.076	0.846	0.055	0.539	1	0.835	-0.81131	-9.541	3 1	0.8181	0.0812626	0.000994459	0.006	0.02	-0.014	0.052	NA	NA	-0.978428	-10.305	3 1	0.852244	-0.0120431	0.301252	-0.038	0.269	-0.023	0.147	NA	NA	-14.928	-0.166605	0.867681	rs2416864	100146339_TGI_at	NM_001004451	REFSEQ	human	Homo sapiens olfactory receptor, family 1, subfamily J, member 1	Q8NGS3	OR1J1	Hs.632692
NA	NA	NA	NA	2 1	0.90027	-0.0337643	0.00193056	-0.008	0.057	-0.006	0.045	NA	NA	NA	NA	2 1	0.891853	-0.00878043	0.767772	0.006	0.021	0.076	0.347	NA	NA	NA	NA	2 1	0.907747	-0.0173029	0.212787	0.052	0.399	0.071	0.599	1	0.84	-4.22	-3.30841	0.000938261	rs39739	100123759_TGI_at	NM_002047	REFSEQ	human	Homo sapiens glycyl-tRNA synthetase (GARS), mRNA.	P41250	GARS	Hs.404321
NA	NA	0.61177	8.794	1 3	0.701533	0.00912782	0.168443	-0.016	0.121	-0.037	0.324	NA	NA	NA	NA	1 3	0.691899	0.0103338	0.618439	-0.003	0.01	0.052	0.218	1	0.855	0.57249	7.24	1 3	0.700244	-0.0315161	0.000395529	0.075	0.642	-0.006	0.032	NA	NA	11.666	-0.508724	0.610945	rs7895820	100149144_TGI_at	AK021984	GENBANK	human	Homo sapiens cDNA FLJ11922 fis, clone HEMBB1000336.	Q5T5P2	KIAA1217	Hs.445885
NA	NA	-0.883045	-7.908	4 2	0.911348	0.00621527	0.562881	0.035	0.303	0.054	0.531	NA	NA	-0.866254	-5.42	4 2	0.946602	0.0355879	0.413962	-0.017	0.063	-0.025	0.096	1	0.835	-0.888763	-6.54	4 2	0.921918	-0.0531213	0.000167982	0.063	0.51	0.105	1.052	NA	NA	-11.501	-1.38633	0.165645	rs12237007	100158212_TGI_at	NM_001080398	REFSEQ	human	Homo sapiens KIAA0368 (KIAA0368), mRNA.	Q5VYK3	KIAA0368	Hs.368255
NA	NA	NA	NA	4 2	0.394798	0.0188788	0.00204986	0.014	0.104	0.03	0.245	NA	NA	NA	NA	4 2	0.39201	-0.0316451	0.108609	-0.039	0.156	-0.036	0.14	NA	NA	NA	NA	4 2	0.379479	0.0150348	0.0608561	-0.054	0.413	-0.034	0.238	1	0.945	4.562	3.46188	0.000536408	rs4074672	100126465_TGI_at	NM_001023587	REFSEQ	human	Homo sapiens ATP-binding cassette, sub-family C (CFTR/MRP), member	O15440	ABCC5	Hs.368563
NA	NA	NA	NA	1 3	0.232777	-0.0241426	0.000429773	0.023	0.185	0.023	0.18	NA	NA	NA	NA	1 3	0.212032	0.00516664	0.822681	0.041	0.165	0.055	0.23	NA	NA	NA	NA	1 3	0.220871	-0.0149371	0.118077	-0.011	0.064	0.02	0.127	1	0.88	-4.04	-3.81798	0.000134551	rs2286721	100150350_TGI_at	NM_014231	REFSEQ	human	Homo sapiens vesicle-associated membrane protein 1 (synaptobrevin	P23763	VAMP1	Hs.20021
1	0.865	0.641746	9.555	3 1	0.387589	-0.0228027	0.000482096	-0.055	0.532	-0.07	0.751	NA	NA	0.465705	6.665	3 1	0.369592	-0.0164416	0.37384	-0.126	0.678	-0.21	1.45	NA	NA	NA	NA	3 1	0.407082	0.0111742	0.210074	-0.183	2.538	-0.149	1.81	NA	NA	12.007	-2.57781	0.00994298	rs11123512	100127764_TGI_at	NM_001017927	REFSEQ	human	Homo sapiens hypothetical protein LOC130355 (LOC130355), mRNA.	Q3KRA6	LOC130355	Hs.99488
NA	NA	NA	NA	4 2	0.394798	0.0188788	0.00204986	-0.02	0.155	-0.01	0.074	NA	NA	NA	NA	4 2	0.39201	-0.0316451	0.108609	-0.068	0.303	-0.081	0.374	NA	NA	NA	NA	4 2	0.379479	0.0150348	0.0608561	-0.053	0.401	-0.03	0.201	1	0.93	4.386	3.46188	0.000536408	rs4074672	100134567_TGI_at	BE549568	DBEST	human	Transcribed locus
NA	NA	NA	NA	1 3	0.40145	0.0180415	0.00389408	-0.054	0.53	-0.055	0.531	NA	NA	NA	NA	1 3	0.411553	-0.0262096	0.173684	0.003	0.009	-0.032	0.124	NA	NA	NA	NA	1 3	0.397505	0.0165162	0.033657	0.016	0.1	-0.01	0.059	1	0.81	-4.403	3.44395	0.000573271	rs872013	100160991_TGI_at	NM_024871	REFSEQ	human	Homo sapiens MAP6 domain containing 1 (MAP6D1), mRNA.	Q9H9H5	MAP6D1	Hs.478465
NA	NA	NA	NA	4 2	0.793144	0.00170296	0.828536	0.023	0.181	0.029	0.235	1	0.91	0.518438	4.899	4 2	0.870063	-0.100168	0.00032944	0.019	0.069	0.079	0.364	NA	NA	0.473241	4.608	4 2	0.839726	0.00824507	0.446077	0.004	0.022	0.018	0.114	NA	NA	6.869	0.283403	0.776868	rs11758089	100307519_TGI_at	BM971125	DBEST	human
NA	NA	NA	NA	4 1	0.703316	-0.0215014	0.0013511	-0.054	0.52	-0.06	0.61	NA	NA	NA	NA	4 1	0.723284	-0.0193922	0.357083	-0.043	0.176	0.023	0.088	NA	NA	0.357804	4.465	4 1	0.691799	-0.0121349	0.149537	-0.121	1.301	-0.079	0.697	1	0.88	5.635	-3.54561	0.000391713	rs1949817	100301537_TGI_at	NM_032194	REFSEQ	human	Homo sapiens brix domain containing 1 (BXDC1), mRNA.	Q9H7B2	BXDC1	Hs.372265
1	0.805	-0.389481	-5.616	2 4	0.604012	-0.0210362	0.000890513	-0.059	0.586	-0.053	0.508	NA	NA	NA	NA	2 4	0.584941	-0.0363605	0.0508236	-0.089	0.424	-0.083	0.39	NA	NA	-0.320235	-4.582	2 4	0.596233	0.00810649	0.280573	0.017	0.104	0.033	0.226	NA	NA	-8.264	-2.27444	0.0229397	rs917219	100311618_TGI_at	AK124888	GENBANK	human	Homo sapiens cDNA FLJ42898 fis, clone BRHIP3009318.
NA	NA	NA	NA	4 2	0.214496	-0.0226344	0.00335095	0.042	0.38	0.076	0.85	NA	NA	NA	NA	4 2	0.205996	0.000471813	0.985056	0.161	0.964	0.148	0.852	NA	NA	NA	NA	4 2	0.216918	-0.0194656	0.0635919	-0.02	0.128	0.036	0.248	1	0.865	-4.26	-3.44939	0.000561855	rs17704078	100311707_TGI_at	AK097144	GENBANK	human	Homo sapiens cDNA FLJ39825 fis, clone SPLEN2012175, moderately similar to Danio rerio uridine kinase mRNA.	Q9NWW6	C9orf95	Hs.494186
NA	NA	NA	NA	NA	NA	NA	NA	-0.014	0.102	0.009	0.064	NA	NA	NA	NA	2 1	0.934482	0.126405	0.000562964	-0.039	0.156	-0.024	0.09	NA	NA	NA	NA	NA	NA	NA	NA	-0.082	0.734	-0.1	0.975	1	0.89	-4.087	3.44886	0.000562964	rs17171525	100308922_TGI_at	BE501759	DBEST	human		Q7LBC6	JMJD1B	Hs.714832
NA	NA	-0.60445	-8.725	4 1	0.681488	-0.00048684	0.942289	0.046	0.42	0.051	0.491	1	0.915	-0.525131	-7.37	4 1	0.679814	0.0673127	0.000915744	0.003	0.011	-0.021	0.078	NA	NA	-0.541435	-7.184	4 1	0.639574	-0.00697114	0.424199	-0.034	0.23	-0.032	0.215	NA	NA	-13.477	-0.145894	0.884005	rs3744281	100307070_TGI_at	BQ773020	DBEST	human
NA	NA	-0.422033	-6.555	2 4	0.54782	-0.00823481	0.16915	-0.067	0.71	-0.083	0.961	NA	NA	NA	NA	2 4	0.563916	0.00341684	0.861969	-0.212	1.479	-0.198	1.323	1	0.885	-0.364911	-4.969	2 4	0.569903	0.0276184	0.000484382	-0.16	2.031	-0.128	1.415	NA	NA	-8.964	0.590596	0.554791	rs2044052	100310015_TGI_at	BC011842	GENBANK	human	Homo sapiens hypothetical protein FLJ11184, mRNA (cDNA clone MGC:19960 IMAGE:4110177), complete cds.	Q96EY4	FLJ11184	Hs.267446
NA	NA	0.500651	6.429	4 3	0.752944	0.0146875	0.0474043	-0.044	0.401	-0.038	0.331	NA	NA	NA	NA	4 3	0.712193	-0.00727506	0.726987	-0.077	0.355	-0.026	0.097	1	0.92	0.364137	4.414	4 3	0.72277	-0.0285962	0.000968552	-0.14	1.623	-0.133	1.505	NA	NA	8.332	-0.412205	0.680189	rs525276	100303350_TGI_at	NM_001031693	REFSEQ	human	Homo sapiens HERV-H LTR-associating 3 (HHLA3), transcript variant	Q9XRX5	HHLA3	Hs.142245
NA	NA	-0.535995	-6.951	2 4	0.752946	0.0146879	0.0473988	-0.043	0.393	-0.028	0.23	NA	NA	NA	NA	2 4	0.709968	-0.00727506	0.726987	-0.073	0.327	-0.043	0.175	1	0.945	-0.357999	-4.386	2 4	0.721923	-0.0287759	0.000856703	-0.166	2.156	-0.127	1.404	NA	NA	-8.884	-0.44831	0.653929	rs559062	100302460_TGI_at	NM_007071	REFSEQ	human	Homo sapiens HERV-H LTR-associating 3 (HHLA3), transcript variant	Q9XRX5	HHLA3	Hs.142245
NA	NA	NA	NA	NA	NA	NA	NA	-0.006	0.042	0.004	0.025	NA	NA	NA	NA	NA	NA	NA	NA	0.153	0.899	0.151	0.878	NA	NA	NA	NA	1 3	0.939726	0.0541809	0.000579471	0.074	0.636	0.031	0.212	1	0.95	5.967	3.44105	0.000579471	rs11768813	100312977_TGI_at	AF439977	GENBANK	human		Q8NI28		Hs.647014
NA	NA	0.691376	6.46	4 2	0.875667	-0.00885367	0.385592	-0.11	1.471	-0.118	1.636	1	0.95	0.565483	4.668	4 2	0.887055	-0.134952	8.06687e-05	-0.15	0.876	-0.185	1.197	NA	NA	NA	NA	4 2	0.898115	-0.00647195	0.644691	-0.134	1.528	-0.088	0.814	NA	NA	8.617	-1.30435	0.192116	rs1736924	100311825_TGI_at	AK092748	GENBANK	human	Homo sapiens cDNA FLJ35429 fis, clone SMINT2002126.			Hs.655949
NA	NA	0.731434	8.927	2 4	0.817384	0.000532735	0.947756	-0.084	0.973	-0.059	0.595	1	0.85	0.429698	4.437	2 4	0.824331	0.0861284	0.00067032	0.041	0.164	0.073	0.329	NA	NA	0.673833	7.21	2 4	0.828085	-0.016349	0.128037	0.02	0.128	0.001	0.005	NA	NA	12.167	-0.384943	0.70028	rs4689486	100302233_TGI_at	NM_015274	REFSEQ	human	Homo sapiens mannosidase, alpha, class 2B, member 2 (MAN2B2), mRNA.	Q9Y2E5	MAN2B2	Hs.188464
NA	NA	0.451532	5.367	1 3	0.802208	0.00870152	0.286108	-0.054	0.522	-0.029	0.239	NA	NA	0.739882	8.49	1 3	0.81372	0.0100652	0.681302	-0.034	0.132	-0.083	0.389	1	0.94	0.691342	7.209	1 3	0.84489	0.0383923	0.000187958	-0.029	0.195	-0.09	0.83	NA	NA	12.002	2.95127	0.00316469	rs12179536	100304000_TGI_at	ENST00000376242	ENSEMBL	human	Sim:AY484516, Homo sapiens psoriasis susceptibility 1 candidate 3 (PSORS1C3) mRNA, complete cds. (e=0.0,score=1152,99% ID over 590nt [query=593nt], plus strand, blastn,Homo sapiens)			Hs.670091
NA	NA	NA	NA	1 3	0.70331	-0.0214954	0.0013527	-0.009	0.065	-0.023	0.177	NA	NA	NA	NA	1 3	0.723301	-0.0193856	0.357249	-0.25	1.938	-0.255	2.003	NA	NA	NA	NA	1 3	0.691796	-0.0121342	0.149434	0.014	0.087	0.007	0.038	1	0.875	-4.355	-3.5454	0.000392019	rs2691171	100311969_TGI_at	AK056264	GENBANK	human	Homo sapiens cDNA FLJ31702 fis, clone NT2RI2006081.	Q9H7B2	BXDC1	Hs.372265
NA	NA	NA	NA	2 1	0.90027	-0.0337643	0.00193056	0.029	0.235	0.009	0.061	NA	NA	NA	NA	2 1	0.891853	-0.00878043	0.767772	0.104	0.524	0.142	0.803	NA	NA	NA	NA	2 1	0.907747	-0.0173029	0.212787	0.072	0.614	0.066	0.539	1	0.875	4.582	-3.30841	0.000938261	rs39739	100305932_TGI_at	BX648714	GENBANK	human				Hs.561708
NA	NA	-0.417434	-6.45	4 2	0.553191	-0.00638777	0.29549	0.061	0.615	0.077	0.859	NA	NA	NA	NA	4 2	0.51699	0.0157554	0.404598	-0.146	0.835	-0.158	0.939	1	0.83	-0.475848	-6.644	4 2	0.550685	-0.0303019	0.000145308	0.029	0.197	0.029	0.195	NA	NA	-10.011	-2.77288	0.00555627	rs4398451	100306940_TGI_at	BU157045	DBEST	human		P20339	RAB5A	Hs.475663
NA	NA	0.524686	4.396	4 2	0.914887	-0.0333435	0.00272908	-0.138	2.107	-0.14	2.17	NA	NA	NA	NA	4 2	0.922328	0.00860654	0.820202	-0.054	0.225	-0.048	0.197	NA	NA	NA	NA	4 2	0.926025	-0.0215718	0.134609	-0.119	1.268	-0.12	1.278	1	0.855	6.307	-3.31526	0.00091557	rs2287765	100305138_TGI_at	CU445838	DBEST	human		Q9NQ38	SPINK5	Hs.331555
NA	NA	NA	NA	4 2	0.370573	0.0174216	0.00544087	0.113	1.532	0.095	1.173	NA	NA	NA	NA	4 2	0.331324	0.0249709	0.212579	-0.049	0.202	-0.042	0.17	NA	NA	0.339696	4.453	4 2	0.380919	0.0157064	0.0532387	0.161	2.054	0.146	1.737	1	0.9	6.992	3.46942	0.000521586	rs2474028	100310427_TGI_at	AX721191	GENBANK	human	Sequence 151 from Patent WO0220754.
NA	NA	NA	NA	1 3	0.651864	-0.0218091	0.000577534	0.087	1.027	0.116	1.603	NA	NA	NA	NA	1 3	0.706813	-0.00878858	0.693483	-0.003	0.012	-0.016	0.058	NA	NA	NA	NA	1 3	0.640567	-0.00916798	0.303556	-0.059	0.472	-0.066	0.545	1	0.895	-4.481	-3.55813	0.000373501	rs2647404	100312213_TGI_at	AK001406	GENBANK	human	Homo sapiens cDNA FLJ10544 fis, clone NT2RP2001601, highly similar to Homo sapiens mRNA for KIAA0797 protein.	Q9GZR1	SENP6	Hs.485784
NA	NA	NA	NA	2 4	0.31733	-0.00720496	0.289197	-0.019	0.145	-0.048	0.447	NA	NA	-0.397105	-5.108	2 4	0.294472	-0.0211391	0.296762	0.07	0.314	0.039	0.154	1	0.925	-0.62526	-8.418	2 4	0.346638	0.0278963	0.000952947	-0.134	1.525	-0.083	0.746	NA	NA	-9.721	0.839708	0.401072	rs1559885	100311303_TGI_at	AL119304	DBEST	human			C8orf46	Hs.709249
NA	NA	-0.448827	-5.583	2 4	0.752946	0.0146879	0.0473988	-0.058	0.582	-0.019	0.142	NA	NA	NA	NA	2 4	0.709968	-0.00727506	0.726987	-0.106	0.534	-0.053	0.222	1	0.975	-0.351589	-4.28	2 4	0.721923	-0.0287759	0.000856703	-0.162	2.07	-0.125	1.373	NA	NA	-7.567	-0.44831	0.653929	rs559062	100303318_TGI_at	NM_001036645	REFSEQ	human	Homo sapiens HERV-H LTR-associating 3 (HHLA3), transcript variant	Q9XRX5	HHLA3	Hs.142245
NA	NA	0.696879	9.464	2 4	0.786842	0.0231844	0.00200043	-0.101	1.295	-0.067	0.704	NA	NA	0.413997	4.614	2 4	0.82991	-0.0207652	0.379118	0.088	0.417	0.094	0.458	1	0.84	0.574079	6.632	2 4	0.788679	-0.0349835	0.000298762	0.106	1.067	0.149	1.807	NA	NA	12.353	0.67417	0.500203	rs13178300	100310722_TGI_at	AV753237	DBEST	human				Hs.697792
NA	NA	0.505709	6.487	4 3	0.752944	0.0146875	0.0474043	-0.064	0.661	-0.06	0.602	NA	NA	NA	NA	4 3	0.712193	-0.00727506	0.726987	-0.08	0.369	-0.026	0.101	1	0.95	0.355924	4.313	4 3	0.72277	-0.0285962	0.000968552	-0.146	1.741	-0.12	1.279	NA	NA	8.346	-0.412205	0.680189	rs525276	100303317_TGI_at	NM_001036646	REFSEQ	human	Homo sapiens HERV-H LTR-associating 3 (HHLA3), transcript variant	Q9XRX5	HHLA3	Hs.142245
1	0.83	0.999427	18.283	4 1	0.672054	0.0215934	0.00060129	0.116	1.595	0.107	1.4	NA	NA	0.888839	12.493	4 1	0.721483	-0.00335711	0.870535	0.051	0.212	0.052	0.218	NA	NA	1.01801	18.401	4 1	0.652029	0.0139471	0.0818367	0.118	1.25	0.148	1.774	NA	NA	28.754	3.81042	0.000138731	rs1020565	100306539_TGI_at	BX115227	DBEST	human
[truncated: 1 more columns]
